# Supplementary material for: Ambipolar Charge Transport in Organic Semiconductors: How Intramolecular Reorganization Energy Is Controlled by Diradical Character
Source: MDPI journal article supplement (doi:10.3390/molecules28124642), 2023-06-08
Supplement: s1 [file s1]

# Supplementary Materials for

## **Ambipolar Charge Transport in Organic Semiconductors: How Intramolecular Reorganization Energy Is Controlled by Diradical Character**

**Table S1.** Diradical characters and the linear combinations of HOMO and LUMO of the open-shell broken-symmetry (BS) structure for the library of investigated molecules. BS orbitals are expressed as linear combination of closed-shell frontier molecular orbitals ( $H_{cs}$  and  $L_{cs}$ ). Only the  $\alpha$  orbitals are considered. Calculations from RB3LYP and UB3LYP levels of theory together with 6-311G\* basis set. Diradical character are evaluated at PUHF/6-311G\* level.

| Molecule            | $y_0^{PUHF}$ | $H_\alpha$ |          | $L_\alpha$ |          |
|---------------------|--------------|------------|----------|------------|----------|
|                     |              | $H_{cs}$   | $L_{cs}$ | $H_{cs}$   | $L_{cs}$ |
| FF                  | 0.523        | 0.90       | 0.25     | -0.23      | 0.90     |
| DFPy                | 0.541        | 0.92       | -0.38    | 0.35       | 0.93     |
| DFFU                | 0.555        | 0.89       | -0.43    | 0.40       | 0.91     |
| DFTTh               | 0.570        | 0.88       | -0.46    | 0.43       | 0.90     |
| DFTThSO2            | 0.591        | 0.86       | -0.49    | 0.46       | 0.88     |
| 2TIO                | 0.633        | -0.91      | 0.41     | -0.39      | -0.92    |
| EsQ4                | 0.634        | 0.89       | -0.44    | 0.43       | 0.90     |
| A-IIDBT             | 0.641        | -0.91      | 0.34     | -0.32      | -0.90    |
| QDTBDT              | 0.659        | 0.88       | -0.46    | 0.43       | 0.90     |
| DIA <sub>n</sub>    | 0.681        | 0.85       | 0.45     | 0.42       | -0.86    |
| S-IIDBT             | 0.691        | -0.91      | 0.35     | 0.33       | 0.92     |
| NZ                  | 0.742        | 0.86       | -0.51    | 0.48       | 0.87     |
| Ph2-IDPL            | 0.757        | 0.90       | -0.43    | -0.39      | -0.92    |
| BT-DIA <sub>n</sub> | 0.774        | 0.87       | -0.47    | -0.46      | -0.88    |
| TPQ                 | 0.846        | 0.76       | -0.59    | 0.56       | 0.82     |
| BISPHE              | 0.847        | 0.84       | -0.53    | -0.51      | -0.86    |

**Table S2.** Diradical characters and reorganization energies of the investigated library of diradicals. Diradical characters are evaluated at the optimized geometries of the BS structures at PUHF/6-311G\* level of theory. The reorganization energies are calculated both considering the CS ( $\lambda_{CS}$ ) and the BS neutral PES ( $\lambda_{BS}$ ) for hole and electron transports. Calculations carried out at RB3LYP and UB3LYP levels of theory with 6-311G\* basis set.

| Molecule            | $y_0^{PUHF}$ @<br>geo BS | $\lambda_{CS}(\text{hole})$ | $\lambda_{CS}(\text{ele.})$ | $\lambda_{BS}(\text{hole})$ | $\lambda_{BS}(\text{ele.})$ |
|---------------------|--------------------------|-----------------------------|-----------------------------|-----------------------------|-----------------------------|
| EsQ2                | -                        | 0.201                       | 0.489                       | -                           | -                           |
| EsQ3                | -                        | 0.183                       | 0.429                       | -                           | -                           |
| A-IDBT              | -                        | 0.204                       | 0.131                       | -                           | -                           |
| S-IDBT              | -                        | 0.285                       | 0.197                       | -                           | -                           |
| FF                  | 0.523                    | 0.227                       | 0.219                       | 0.147                       | 0.158                       |
| DFPy                | 0.541                    | 0.210                       | 0.216                       | 0.104                       | 0.114                       |
| DFFU                | 0.555                    | 0.212                       | 0.222                       | 0.101                       | 0.113                       |
| DFTTh               | 0.570                    | 0.190                       | 0.237                       | 0.093                       | 0.136                       |
| DFTThSO2            | 0.591                    | 0.258                       | 0.209                       | 0.123                       | 0.102                       |
| 2TIO                | 0.633                    | 0.115                       | 0.327                       | 0.056                       | 0.113                       |
| EsQ4                | 0.634                    | 0.168                       | 0.382                       | 0.108                       | 0.171                       |
| A-IIDBT             | 0.641                    | 0.219                       | 0.086                       | 0.148                       | 0.100                       |
| QDTBDT              | 0.659                    | 0.068                       | 0.244                       | 0.050                       | 0.080                       |
| DIA <sub>n</sub>    | 0.681                    | 0.189                       | 0.169                       | 0.069                       | 0.104                       |
| S-IIDBT             | 0.691                    | 0.194                       | 0.088                       | 0.126                       | 0.078                       |
| NZ                  | 0.742                    | 0.119                       | 0.127                       | 0.032                       | 0.037                       |
| Ph2-IDPL            | 0.757                    | 0.110                       | 0.032                       | 0.042                       | 0.032                       |
| BT-DIA <sub>n</sub> | 0.774                    | 0.177                       | 0.082                       | 0.090                       | 0.131                       |
| TPQ                 | 0.846                    | 0.049                       | 0.225                       | 0.073                       | 0.031                       |
| BISPHE              | 0.847                    | 0.077                       | 0.023                       | 0.014                       | 0.035                       |

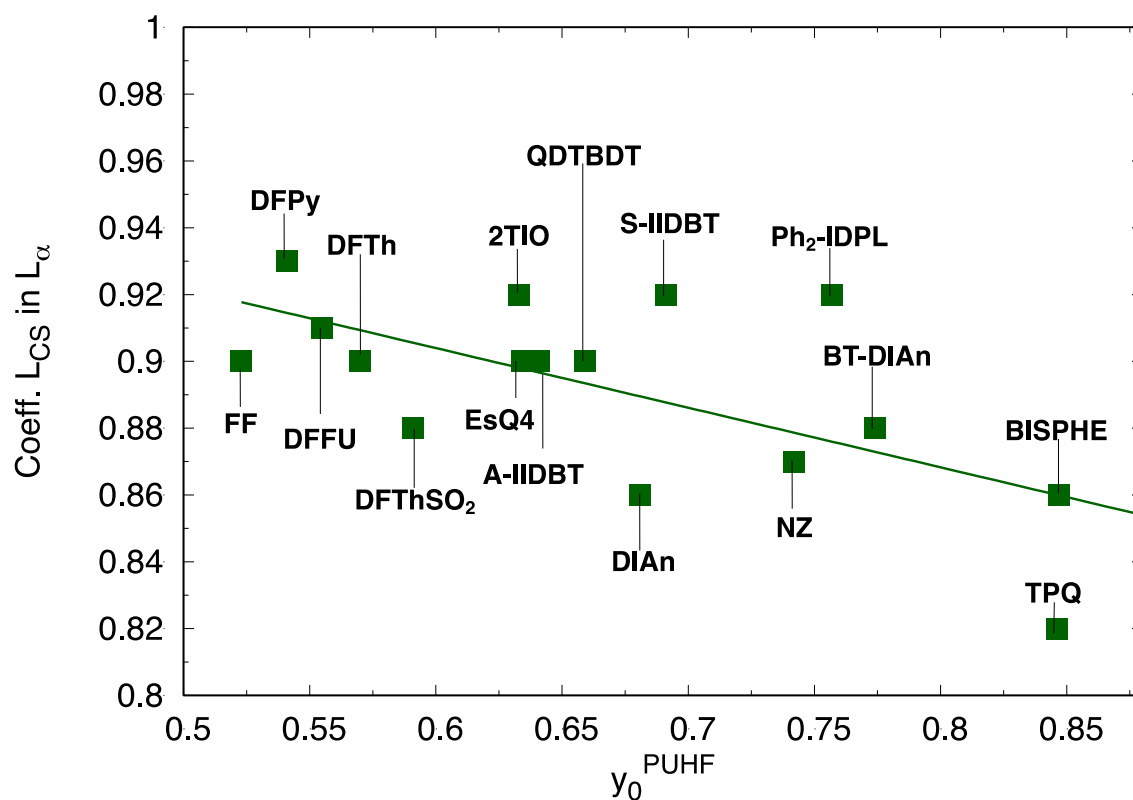

**Figure S1.** Contribution of the  $L_{CS}$  to the  $L_\alpha$  BS orbitals (from RB3LYP/6-311G\* and UB3LYP/6-311G\* calculations), as a function of the computed diradical index  $y_0^{PUHF}$ , for the library of investigated diradicals.

## OPTIMIZED GEOMETRIES

### 2TIO-Neutral: CS-B3LYP/6-311G\* geometry

|   |           |           |          |
|---|-----------|-----------|----------|
| C | 0.005386  | 0.690801  | 0.000000 |
| C | -1.110131 | 1.575529  | 0.000000 |
| C | -0.782625 | 2.900058  | 0.000000 |
| C | 0.620480  | 3.170901  | 0.000000 |
| S | 1.504122  | 1.633515  | 0.000000 |
| H | -2.130484 | 1.211689  | 0.000000 |
| H | -1.522274 | 3.688765  | 0.000000 |
| C | -0.005386 | -0.690801 | 0.000000 |
| C | 1.110131  | -1.575529 | 0.000000 |
| S | -1.504122 | -1.633515 | 0.000000 |
| C | 0.782625  | -2.900058 | 0.000000 |
| H | 2.130484  | -1.211689 | 0.000000 |
| C | -0.620480 | -3.170901 | 0.000000 |
| H | 1.522274  | -3.688765 | 0.000000 |
| C | 1.258635  | 4.407898  | 0.000000 |
| C | 2.697914  | 4.520721  | 0.000000 |
| C | 0.502695  | 5.640337  | 0.000000 |
| C | 3.322137  | 5.720406  | 0.000000 |
| H | 3.293225  | 3.612248  | 0.000000 |
| C | 1.110131  | 6.848933  | 0.000000 |
| H | -0.580569 | 5.594522  | 0.000000 |
| C | 2.572385  | 6.984948  | 0.000000 |
| H | 4.403845  | 5.799023  | 0.000000 |
| H | 0.539045  | 7.771003  | 0.000000 |
| C | -1.258635 | -4.407898 | 0.000000 |
| C | -0.502695 | -5.640337 | 0.000000 |
| C | -2.697914 | -4.520721 | 0.000000 |
| C | -1.110131 | -6.848933 | 0.000000 |
| H | 0.580569  | -5.594522 | 0.000000 |
| C | -3.322137 | -5.720406 | 0.000000 |
| H | -3.293225 | -3.612248 | 0.000000 |
| C | -2.572385 | -6.984948 | 0.000000 |
| H | -0.539045 | -7.771003 | 0.000000 |
| H | -4.403845 | -5.799023 | 0.000000 |
| O | -3.132599 | -8.078824 | 0.000000 |
| O | 3.132599  | 8.078824  | 0.000000 |

### 2TIO-Neutral: BS-UB3LYP/6-311G\* geometry

|   |           |          |          |
|---|-----------|----------|----------|
| C | -0.003198 | 0.701142 | 0.000000 |
|---|-----------|----------|----------|

|   |           |           |          |
|---|-----------|-----------|----------|
| C | -1.113571 | 1.568483  | 0.000000 |
| C | -0.786940 | 2.907353  | 0.000000 |
| C | 0.602113  | 3.174733  | 0.000000 |
| S | 1.486793  | 1.643707  | 0.000000 |
| H | -2.133193 | 1.202522  | 0.000000 |
| H | -1.529890 | 3.693163  | 0.000000 |
| C | 0.003198  | -0.701142 | 0.000000 |
| C | 1.113571  | -1.568483 | 0.000000 |
| S | -1.486793 | -1.643707 | 0.000000 |
| C | 0.786940  | -2.907353 | 0.000000 |
| H | 2.133193  | -1.202522 | 0.000000 |
| C | -0.602113 | -3.174733 | 0.000000 |
| H | 1.529890  | -3.693163 | 0.000000 |
| C | 1.253224  | 4.423597  | 0.000000 |
| C | 2.686950  | 4.528656  | 0.000000 |
| C | 0.501585  | 5.651587  | 0.000000 |
| C | 3.317516  | 5.729915  | 0.000000 |
| H | 3.280213  | 3.618900  | 0.000000 |
| C | 1.113571  | 6.862279  | 0.000000 |
| H | -0.581822 | 5.608637  | 0.000000 |
| C | 2.572804  | 6.992664  | 0.000000 |
| H | 4.399626  | 5.803698  | 0.000000 |
| H | 0.544001  | 7.785390  | 0.000000 |
| C | -1.253224 | -4.423597 | 0.000000 |
| C | -0.501585 | -5.651587 | 0.000000 |
| C | -2.686950 | -4.528656 | 0.000000 |
| C | -1.113571 | -6.862279 | 0.000000 |
| H | 0.581822  | -5.608637 | 0.000000 |
| C | -3.317516 | -5.729915 | 0.000000 |
| H | -3.280213 | -3.618900 | 0.000000 |
| C | -2.572804 | -6.992664 | 0.000000 |
| H | -0.544001 | -7.785390 | 0.000000 |
| H | -4.399626 | -5.803698 | 0.000000 |
| O | -3.137541 | -8.088678 | 0.000000 |
| O | 3.137541  | 8.088678  | 0.000000 |

**2TIO-Cation: UB3LYP/6-311G\* geometry**

|   |           |           |          |
|---|-----------|-----------|----------|
| C | -0.000719 | 0.704466  | 0.000000 |
| C | -1.118874 | 1.567187  | 0.000000 |
| C | -0.789035 | 2.902474  | 0.000000 |
| C | 0.604072  | 3.156222  | 0.000000 |
| S | 1.483393  | 1.629719  | 0.000000 |
| H | -2.139155 | 1.204452  | 0.000000 |
| H | -1.529749 | 3.689842  | 0.000000 |
| C | 0.000719  | -0.704466 | 0.000000 |

|   |           |           |          |
|---|-----------|-----------|----------|
| C | 1.118874  | -1.567187 | 0.000000 |
| S | -1.483393 | -1.629719 | 0.000000 |
| C | 0.789035  | -2.902474 | 0.000000 |
| H | 2.139155  | -1.204452 | 0.000000 |
| C | -0.604072 | -3.156222 | 0.000000 |
| H | 1.529749  | -3.689842 | 0.000000 |
| C | 1.261956  | 4.403682  | 0.000000 |
| C | 2.701174  | 4.488789  | 0.000000 |
| C | 0.503246  | 5.630833  | 0.000000 |
| C | 3.337728  | 5.683188  | 0.000000 |
| H | 3.286352  | 3.574860  | 0.000000 |
| C | 1.118874  | 6.836866  | 0.000000 |
| H | -0.578902 | 5.588535  | 0.000000 |
| C | 2.586235  | 6.950046  | 0.000000 |
| H | 4.419187  | 5.757732  | 0.000000 |
| H | 0.559145  | 7.765235  | 0.000000 |
| C | -1.261956 | -4.403682 | 0.000000 |
| C | -0.503246 | -5.630833 | 0.000000 |
| C | -2.701174 | -4.488789 | 0.000000 |
| C | -1.118874 | -6.836866 | 0.000000 |
| H | 0.578902  | -5.588535 | 0.000000 |
| C | -3.337728 | -5.683188 | 0.000000 |
| H | -3.286352 | -3.574860 | 0.000000 |
| C | -2.586235 | -6.950046 | 0.000000 |
| H | -0.559145 | -7.765235 | 0.000000 |
| H | -4.419187 | -5.757732 | 0.000000 |
| O | -3.152660 | -8.035922 | 0.000000 |
| O | 3.152660  | 8.035922  | 0.000000 |

### 2TIO-Anion: UB3LYP/6-311G\* geometry

|   |           |           |          |
|---|-----------|-----------|----------|
| C | 0.007680  | 0.706374  | 0.000000 |
| C | -1.065190 | 1.598947  | 0.000000 |
| C | -0.701624 | 2.943183  | 0.000000 |
| C | 0.680008  | 3.180188  | 0.000000 |
| S | 1.522917  | 1.620685  | 0.000000 |
| H | -2.095368 | 1.261343  | 0.000000 |
| H | -1.427026 | 3.746501  | 0.000000 |
| C | -0.007680 | -0.706374 | 0.000000 |
| C | 1.065190  | -1.598947 | 0.000000 |
| S | -1.522917 | -1.620685 | 0.000000 |
| C | 0.701624  | -2.943183 | 0.000000 |
| H | 2.095368  | -1.261343 | 0.000000 |
| C | -0.680008 | -3.180188 | 0.000000 |
| H | 1.427026  | -3.746501 | 0.000000 |
| C | 1.379946  | 4.418576  | 0.000000 |

|   |           |           |          |
|---|-----------|-----------|----------|
| C | 2.805879  | 4.490920  | 0.000000 |
| C | 0.680008  | 5.666066  | 0.000000 |
| C | 3.476257  | 5.680688  | 0.000000 |
| H | 3.377772  | 3.566034  | 0.000000 |
| C | 1.332192  | 6.864983  | 0.000000 |
| H | -0.406127 | 5.661266  | 0.000000 |
| C | 2.786253  | 6.964231  | 0.000000 |
| H | 4.561899  | 5.712072  | 0.000000 |
| H | 0.781959  | 7.801580  | 0.000000 |
| C | -1.379946 | -4.418576 | 0.000000 |
| C | -0.680008 | -5.666066 | 0.000000 |
| C | -2.805879 | -4.490920 | 0.000000 |
| C | -1.332192 | -6.864983 | 0.000000 |
| H | 0.406127  | -5.661266 | 0.000000 |
| C | -3.476257 | -5.680688 | 0.000000 |
| H | -3.377772 | -3.566034 | 0.000000 |
| C | -2.786253 | -6.964231 | 0.000000 |
| H | -0.781959 | -7.801580 | 0.000000 |
| H | -4.561899 | -5.712072 | 0.000000 |
| O | -3.388319 | -8.053958 | 0.000000 |
| O | 3.388319  | 8.053958  | 0.000000 |

**EsQ2-Neutral: CS-B3LYP/6-311G\* geometry**

|   |           |           |          |
|---|-----------|-----------|----------|
| C | 0.001327  | 0.685668  | 0.000000 |
| C | 1.144818  | 1.551244  | 0.000000 |
| C | 0.837620  | 2.871411  | 0.000000 |
| C | -0.577569 | 3.147996  | 0.000000 |
| S | -1.499964 | 1.647560  | 0.000000 |
| H | 2.158569  | 1.169440  | 0.000000 |
| H | 1.564145  | 3.673690  | 0.000000 |
| C | -0.001327 | -0.685668 | 0.000000 |
| C | -1.144818 | -1.551244 | 0.000000 |
| S | 1.499964  | -1.647560 | 0.000000 |
| C | -0.837620 | -2.871411 | 0.000000 |
| H | -2.158569 | -1.169440 | 0.000000 |
| C | 0.577569  | -3.147996 | 0.000000 |
| H | -1.564145 | -3.673690 | 0.000000 |
| C | 1.144818  | -4.403705 | 0.000000 |
| C | 2.611207  | -4.564090 | 0.000000 |
| O | 3.382918  | -3.626393 | 0.000000 |
| C | 0.309177  | -5.552361 | 0.000000 |
| N | -0.400643 | -6.465892 | 0.000000 |
| O | 2.985258  | -5.849495 | 0.000000 |
| C | 4.403115  | -6.094256 | 0.000000 |
| H | 4.505917  | -7.175988 | 0.000000 |

|   |           |           |           |
|---|-----------|-----------|-----------|
| H | 4.862662  | -5.662008 | 0.889216  |
| H | 4.862662  | -5.662008 | -0.889216 |
| C | -1.144818 | 4.403705  | 0.000000  |
| C | -0.309177 | 5.552361  | 0.000000  |
| N | 0.400643  | 6.465892  | 0.000000  |
| C | -2.611207 | 4.564090  | 0.000000  |
| O | -3.382918 | 3.626393  | 0.000000  |
| O | -2.985258 | 5.849495  | 0.000000  |
| C | -4.403115 | 6.094256  | 0.000000  |
| H | -4.862662 | 5.662008  | 0.889216  |
| H | -4.862662 | 5.662008  | -0.889216 |
| H | -4.505917 | 7.175988  | 0.000000  |

**EsQ2-Cation: UB3LYP/6-311G\* geometry**

|   |           |           |           |
|---|-----------|-----------|-----------|
| C | 0.005070  | 0.702231  | 0.000000  |
| C | 1.154134  | 1.546164  | 0.000000  |
| C | 0.844613  | 2.874208  | 0.000000  |
| C | -0.565342 | 3.133747  | 0.000000  |
| S | -1.483056 | 1.629620  | 0.000000  |
| H | 2.167665  | 1.165168  | 0.000000  |
| H | 1.571890  | 3.676205  | 0.000000  |
| C | -0.005070 | -0.702231 | 0.000000  |
| C | -1.154134 | -1.546164 | 0.000000  |
| S | 1.483056  | -1.629620 | 0.000000  |
| C | -0.844613 | -2.874208 | 0.000000  |
| H | -2.167665 | -1.165168 | 0.000000  |
| C | 0.565342  | -3.133747 | 0.000000  |
| H | -1.571890 | -3.676205 | 0.000000  |
| C | 1.154134  | -4.384179 | 0.000000  |
| C | 2.649111  | -4.523943 | 0.000000  |
| O | 3.374347  | -3.555324 | 0.000000  |
| C | 0.345625  | -5.544875 | 0.000000  |
| N | -0.339080 | -6.478212 | 0.000000  |
| O | 3.021342  | -5.788866 | 0.000000  |
| C | 4.449156  | -6.054103 | 0.000000  |
| H | 4.532338  | -7.135968 | 0.000000  |
| H | 4.902099  | -5.624324 | 0.892289  |
| H | 4.902099  | -5.624324 | -0.892289 |
| C | -1.154134 | 4.384179  | 0.000000  |
| C | -0.345625 | 5.544875  | 0.000000  |
| N | 0.339080  | 6.478212  | 0.000000  |
| C | -2.649111 | 4.523943  | 0.000000  |
| O | -3.374347 | 3.555324  | 0.000000  |
| O | -3.021342 | 5.788866  | 0.000000  |
| C | -4.449156 | 6.054103  | 0.000000  |

|   |           |          |           |
|---|-----------|----------|-----------|
| H | -4.902099 | 5.624324 | 0.892289  |
| H | -4.902099 | 5.624324 | -0.892289 |
| H | -4.532338 | 7.135968 | 0.000000  |

**EsQ2-Anion: UB3LYP/6-311G\* geometry**

|   |           |           |           |
|---|-----------|-----------|-----------|
| C | -0.013478 | 0.703875  | 0.000000  |
| C | 1.064512  | 1.598554  | 0.000000  |
| C | 0.696270  | 2.935662  | 0.000000  |
| C | -0.696270 | 3.152860  | 0.000000  |
| S | -1.544312 | 1.606277  | 0.000000  |
| H | 2.095648  | 1.264251  | 0.000000  |
| H | 1.397134  | 3.760888  | 0.000000  |
| C | 0.013478  | -0.703875 | 0.000000  |
| C | -1.064512 | -1.598554 | 0.000000  |
| S | 1.544312  | -1.606277 | 0.000000  |
| C | -0.696270 | -2.935662 | 0.000000  |
| H | -2.095648 | -1.264251 | 0.000000  |
| C | 0.696270  | -3.152860 | 0.000000  |
| H | -1.397134 | -3.760888 | 0.000000  |
| C | 1.355856  | -4.402230 | 0.000000  |
| C | 2.798585  | -4.490445 | 0.000000  |
| O | 3.565339  | -3.539318 | 0.000000  |
| C | 0.575300  | -5.582158 | 0.000000  |
| N | -0.099855 | -6.526262 | 0.000000  |
| O | 3.250952  | -5.779862 | 0.000000  |
| C | 4.668911  | -5.925548 | 0.000000  |
| H | 4.851473  | -6.999244 | 0.000000  |
| H | 5.111791  | -5.465558 | 0.886305  |
| H | 5.111791  | -5.465558 | -0.886305 |
| C | -1.355856 | 4.402230  | 0.000000  |
| C | -0.575300 | 5.582158  | 0.000000  |
| N | 0.099855  | 6.526262  | 0.000000  |
| C | -2.798585 | 4.490445  | 0.000000  |
| O | -3.565339 | 3.539318  | 0.000000  |
| O | -3.250952 | 5.779862  | 0.000000  |
| C | -4.668911 | 5.925548  | 0.000000  |
| H | -5.111791 | 5.465558  | 0.886305  |
| H | -5.111791 | 5.465558  | -0.886305 |
| H | -4.851473 | 6.999244  | 0.000000  |

**EsQ3-Neutral: CS-B3LYP/6-311G\* geometry**

|   |          |          |          |
|---|----------|----------|----------|
| C | 0.000000 | 5.145672 | 0.573910 |
| C | 0.000000 | 4.569588 | 1.890830 |
| C | 0.000000 | 3.209952 | 1.902166 |

|   |           |           |           |
|---|-----------|-----------|-----------|
| C | 0.000000  | 2.616428  | 0.604335  |
| S | 0.000000  | 3.880418  | -0.651430 |
| H | 0.000000  | 5.193326  | 2.775289  |
| H | 0.000000  | 2.618930  | 2.810417  |
| C | 0.000000  | 1.274708  | 0.292937  |
| C | 0.000000  | 0.680880  | -1.007614 |
| S | 0.000000  | -0.000000 | 1.525848  |
| C | -0.000000 | -0.680880 | -1.007614 |
| H | 0.000000  | 1.281547  | -1.908770 |
| C | -0.000000 | -1.274708 | 0.292937  |
| H | -0.000000 | -1.281547 | -1.908770 |
| C | -0.000000 | -2.616428 | 0.604335  |
| C | -0.000000 | -3.209952 | 1.902166  |
| S | -0.000000 | -3.880418 | -0.651430 |
| C | -0.000000 | -4.569588 | 1.890830  |
| H | -0.000000 | -2.618930 | 2.810417  |
| C | -0.000000 | -5.145672 | 0.573910  |
| H | -0.000000 | -5.193326 | 2.775289  |
| C | 0.000000  | 6.497385  | 0.287451  |
| C | 0.000000  | 7.437821  | 1.350703  |
| N | 0.000000  | 8.174661  | 2.243072  |
| C | 0.000000  | 6.965887  | -1.107379 |
| O | 0.000000  | 6.215526  | -2.063692 |
| O | 0.000000  | 8.303207  | -1.201206 |
| C | 0.000000  | 8.840857  | -2.534619 |
| H | -0.888999 | 8.515764  | -3.075950 |
| H | 0.000000  | 9.920163  | -2.407585 |
| H | 0.888999  | 8.515764  | -3.075950 |
| C | -0.000000 | -6.497385 | 0.287451  |
| C | -0.000000 | -7.437821 | 1.350703  |
| N | -0.000000 | -8.174661 | 2.243072  |
| C | -0.000000 | -6.965887 | -1.107379 |
| O | -0.000000 | -6.215526 | -2.063692 |
| O | -0.000000 | -8.303207 | -1.201206 |
| C | -0.000000 | -8.840857 | -2.534619 |
| H | -0.000000 | -9.920163 | -2.407585 |
| H | -0.888999 | -8.515764 | -3.075950 |
| H | 0.888999  | -8.515764 | -3.075950 |

**EsQ3-Cation: UB3LYP/6-311G\* geometry**

|   |          |          |           |
|---|----------|----------|-----------|
| C | 0.000000 | 5.126937 | 0.589969  |
| C | 0.000000 | 4.545366 | 1.900489  |
| C | 0.000000 | 3.181551 | 1.894946  |
| C | 0.000000 | 2.621799 | 0.585832  |
| S | 0.000000 | 3.871131 | -0.650470 |

|   |           |           |           |
|---|-----------|-----------|-----------|
| H | 0.000000  | 5.157661  | 2.793248  |
| H | 0.000000  | 2.578919  | 2.794745  |
| C | 0.000000  | 1.259263  | 0.251110  |
| C | 0.000000  | 0.687323  | -1.042806 |
| S | 0.000000  | -0.000000 | 1.473561  |
| C | -0.000000 | -0.687323 | -1.042806 |
| H | 0.000000  | 1.285951  | -1.945052 |
| C | -0.000000 | -1.259263 | 0.251110  |
| H | -0.000000 | -1.285951 | -1.945052 |
| C | -0.000000 | -2.621799 | 0.585832  |
| C | -0.000000 | -3.181551 | 1.894946  |
| S | -0.000000 | -3.871131 | -0.650470 |
| C | -0.000000 | -4.545366 | 1.900489  |
| H | -0.000000 | -2.578919 | 2.794745  |
| C | -0.000000 | -5.126937 | 0.589969  |
| H | -0.000000 | -5.157661 | 2.793248  |
| C | 0.000000  | 6.477378  | 0.308872  |
| C | 0.000000  | 7.418426  | 1.367802  |
| N | 0.000000  | 8.162552  | 2.253796  |
| C | 0.000000  | 6.957900  | -1.106957 |
| O | 0.000000  | 6.188718  | -2.042651 |
| O | 0.000000  | 8.278351  | -1.181033 |
| C | 0.000000  | 8.856922  | -2.509640 |
| H | -0.891626 | 8.541623  | -3.050119 |
| H | 0.000000  | 9.930227  | -2.348475 |
| H | 0.891626  | 8.541623  | -3.050119 |
| C | -0.000000 | -6.477378 | 0.308872  |
| C | -0.000000 | -7.418426 | 1.367802  |
| N | -0.000000 | -8.162552 | 2.253796  |
| C | -0.000000 | -6.957900 | -1.106957 |
| O | -0.000000 | -6.188718 | -2.042651 |
| O | -0.000000 | -8.278351 | -1.181033 |
| C | -0.000000 | -8.856922 | -2.509640 |
| H | -0.000000 | -9.930227 | -2.348475 |
| H | -0.891626 | -8.541623 | -3.050119 |
| H | 0.891626  | -8.541623 | -3.050119 |

**EsQ3-Anion: UB3LYP/6-311G\* geometry**

|   |           |          |           |
|---|-----------|----------|-----------|
| C | -0.000000 | 5.181882 | 0.593383  |
| C | -0.000000 | 4.605710 | 1.880925  |
| C | -0.000000 | 3.219743 | 1.881940  |
| C | -0.000000 | 2.642789 | 0.607363  |
| S | -0.000000 | 3.914746 | -0.632224 |
| H | -0.000000 | 5.217072 | 2.774279  |
| H | -0.000000 | 2.626507 | 2.789652  |

|   |           |           |           |
|---|-----------|-----------|-----------|
| C | -0.000000 | 1.277586  | 0.258907  |
| C | -0.000000 | 0.695497  | -1.014524 |
| S | -0.000000 | -0.000000 | 1.485235  |
| C | -0.000000 | -0.695497 | -1.014524 |
| H | -0.000000 | 1.292191  | -1.918786 |
| C | -0.000000 | -1.277586 | 0.258907  |
| H | -0.000000 | -1.292191 | -1.918786 |
| C | -0.000000 | -2.642789 | 0.607363  |
| C | -0.000000 | -3.219743 | 1.881940  |
| S | -0.000000 | -3.914746 | -0.632224 |
| C | -0.000000 | -4.605710 | 1.880925  |
| H | -0.000000 | -2.626507 | 2.789652  |
| C | -0.000000 | -5.181882 | 0.593383  |
| H | -0.000000 | -5.217072 | 2.774279  |
| C | -0.000000 | 6.559003  | 0.286319  |
| C | -0.000000 | 7.492609  | 1.349207  |
| N | -0.000000 | 8.224346  | 2.249906  |
| C | -0.000000 | 7.020144  | -1.084682 |
| O | -0.000000 | 6.297461  | -2.069543 |
| O | -0.000000 | 8.380410  | -1.187062 |
| C | -0.000000 | 8.890667  | -2.519086 |
| H | -0.886529 | 8.561497  | -3.065527 |
| H | -0.000000 | 9.974610  | -2.415411 |
| H | 0.886529  | 8.561497  | -3.065527 |
| C | -0.000000 | -6.559003 | 0.286319  |
| C | -0.000000 | -7.492609 | 1.349207  |
| N | -0.000000 | -8.224346 | 2.249906  |
| C | -0.000000 | -7.020144 | -1.084682 |
| O | -0.000000 | -6.297461 | -2.069543 |
| O | -0.000000 | -8.380410 | -1.187062 |
| C | -0.000000 | -8.890667 | -2.519086 |
| H | -0.000000 | -9.974610 | -2.415411 |
| H | -0.886529 | -8.561497 | -3.065527 |
| H | 0.886529  | -8.561497 | -3.065527 |

**EsQ4-Neutral: CS-B3LYP/6-311G\* geometry**

|   |           |          |          |
|---|-----------|----------|----------|
| C | 0.705879  | 7.061770 | 0.000000 |
| C | 1.968386  | 6.380605 | 0.000000 |
| C | 1.867005  | 5.021930 | 0.000000 |
| C | 0.528236  | 4.538559 | 0.000000 |
| S | -0.618439 | 5.900302 | 0.000000 |
| H | 2.901613  | 6.928634 | 0.000000 |
| H | 2.724255  | 4.358914 | 0.000000 |
| C | 0.102958  | 3.223779 | 0.000000 |
| C | -1.237389 | 2.739971 | 0.000000 |

|   |           |            |           |
|---|-----------|------------|-----------|
| S | 1.226017  | 1.852445   | 0.000000  |
| C | -1.347409 | 1.377833   | 0.000000  |
| H | -2.087317 | 3.411006   | 0.000000  |
| C | -0.106090 | 0.684040   | 0.000000  |
| H | -2.296304 | 0.855190   | 0.000000  |
| C | 0.106090  | -0.684040  | 0.000000  |
| C | 1.347409  | -1.377833  | 0.000000  |
| S | -1.226017 | -1.852445  | 0.000000  |
| C | 1.237389  | -2.739971  | 0.000000  |
| H | 2.296304  | -0.855190  | 0.000000  |
| C | -0.102958 | -3.223779  | 0.000000  |
| H | 2.087317  | -3.411006  | 0.000000  |
| C | -0.528236 | -4.538559  | 0.000000  |
| C | -1.867005 | -5.021930  | 0.000000  |
| S | 0.618439  | -5.900302  | 0.000000  |
| C | -1.968386 | -6.380605  | 0.000000  |
| H | -2.724255 | -4.358914  | 0.000000  |
| C | -0.705879 | -7.061770  | 0.000000  |
| H | -2.901613 | -6.928634  | 0.000000  |
| C | -0.528236 | -8.434548  | 0.000000  |
| C | 0.528236  | 8.434548   | 0.000000  |
| C | -0.822292 | 9.013402   | 0.000000  |
| O | -1.837868 | 8.344399   | 0.000000  |
| O | -0.808518 | 10.355334  | 0.000000  |
| C | -2.094218 | 10.997056  | 0.000000  |
| H | -2.660356 | 10.716508  | 0.888846  |
| H | -1.881993 | 12.062999  | 0.000000  |
| H | -2.660356 | 10.716508  | -0.888846 |
| C | 1.664132  | 9.284879   | 0.000000  |
| N | 2.614449  | 9.945731   | 0.000000  |
| C | 0.822292  | -9.013402  | 0.000000  |
| O | 1.837868  | -8.344399  | 0.000000  |
| O | 0.808518  | -10.355334 | 0.000000  |
| C | 2.094218  | -10.997056 | 0.000000  |
| H | 2.660356  | -10.716508 | 0.888846  |
| H | 1.881993  | -12.062999 | 0.000000  |
| H | 2.660356  | -10.716508 | -0.888846 |
| C | -1.664132 | -9.284879  | 0.000000  |
| N | -2.614449 | -9.945731  | 0.000000  |

**EsQ4-Neutral: BS-UB3LYP/6-311G\* geometry**

|   |          |          |          |
|---|----------|----------|----------|
| C | 0.704876 | 7.072148 | 0.000000 |
| C | 1.960009 | 6.394005 | 0.000000 |
| C | 1.854647 | 5.026668 | 0.000000 |
| C | 0.523213 | 4.553968 | 0.000000 |

|   |           |            |           |
|---|-----------|------------|-----------|
| S | -0.619203 | 5.909411   | 0.000000  |
| H | 2.895444  | 6.938268   | 0.000000  |
| H | 2.710858  | 4.362538   | 0.000000  |
| C | 0.081763  | 3.224699   | 0.000000  |
| C | -1.243391 | 2.747675   | 0.000000  |
| S | 1.204400  | 1.860791   | 0.000000  |
| C | -1.349917 | 1.369127   | 0.000000  |
| H | -2.097233 | 3.413683   | 0.000000  |
| C | -0.117845 | 0.694001   | 0.000000  |
| H | -2.298032 | 0.845261   | 0.000000  |
| C | 0.117845  | -0.694001  | 0.000000  |
| C | 1.349917  | -1.369127  | 0.000000  |
| S | -1.204400 | -1.860791  | 0.000000  |
| C | 1.243391  | -2.747675  | 0.000000  |
| H | 2.298032  | -0.845261  | 0.000000  |
| C | -0.081763 | -3.224699  | 0.000000  |
| H | 2.097233  | -3.413683  | 0.000000  |
| C | -0.523213 | -4.553968  | 0.000000  |
| C | -1.854647 | -5.026668  | 0.000000  |
| S | 0.619203  | -5.909411  | 0.000000  |
| C | -1.960009 | -6.394005  | 0.000000  |
| H | -2.710858 | -4.362538  | 0.000000  |
| C | -0.704876 | -7.072148  | 0.000000  |
| H | -2.895444 | -6.938268  | 0.000000  |
| C | -0.523213 | -8.450263  | 0.000000  |
| C | 0.523213  | 8.450263   | 0.000000  |
| C | -0.827615 | 9.030590   | 0.000000  |
| O | -1.843882 | 8.363433   | 0.000000  |
| O | -0.810823 | 10.372394  | 0.000000  |
| C | -2.095374 | 11.016924  | 0.000000  |
| H | -2.661924 | 10.737426  | 0.888890  |
| H | -1.880795 | 12.082371  | 0.000000  |
| H | -2.661924 | 10.737426  | -0.888890 |
| C | 1.657256  | 9.300788   | 0.000000  |
| N | 2.607053  | 9.963074   | 0.000000  |
| C | 0.827615  | -9.030590  | 0.000000  |
| O | 1.843882  | -8.363433  | 0.000000  |
| O | 0.810823  | -10.372394 | 0.000000  |
| C | 2.095374  | -11.016924 | 0.000000  |
| H | 2.661924  | -10.737426 | 0.888890  |
| H | 1.880795  | -12.082371 | 0.000000  |
| H | 2.661924  | -10.737426 | -0.888890 |
| C | -1.657256 | -9.300788  | 0.000000  |
| N | -2.607053 | -9.963074  | 0.000000  |

**EsQ4-Cation: UB3LYP/6-311G\* geometry**

|   |           |            |           |
|---|-----------|------------|-----------|
| C | 0.695106  | 7.044387   | 0.000000  |
| C | 1.956607  | 6.362946   | 0.000000  |
| C | 1.847381  | 5.003297   | 0.000000  |
| C | 0.501249  | 4.541971   | 0.000000  |
| S | -0.637137 | 5.885589   | 0.000000  |
| H | 2.893264  | 6.905573   | 0.000000  |
| H | 2.699236  | 4.334461   | 0.000000  |
| C | 0.064736  | 3.210540   | 0.000000  |
| C | -1.263128 | 2.733230   | 0.000000  |
| S | 1.191456  | 1.857419   | 0.000000  |
| C | -1.363310 | 1.358729   | 0.000000  |
| H | -2.119953 | 3.395294   | 0.000000  |
| C | -0.119782 | 0.694867   | 0.000000  |
| H | -2.308337 | 0.830012   | 0.000000  |
| C | 0.119782  | -0.694867  | 0.000000  |
| C | 1.363310  | -1.358729  | 0.000000  |
| S | -1.191456 | -1.857419  | 0.000000  |
| C | 1.263128  | -2.733230  | 0.000000  |
| H | 2.308337  | -0.830012  | 0.000000  |
| C | -0.064736 | -3.210540  | 0.000000  |
| H | 2.119953  | -3.395294  | 0.000000  |
| C | -0.501249 | -4.541971  | 0.000000  |
| C | -1.847381 | -5.003297  | 0.000000  |
| S | 0.637137  | -5.885589  | 0.000000  |
| C | -1.956607 | -6.362946  | 0.000000  |
| H | -2.699236 | -4.334461  | 0.000000  |
| C | -0.695106 | -7.044387  | 0.000000  |
| H | -2.893264 | -6.905573  | 0.000000  |
| C | -0.519478 | -8.412278  | 0.000000  |
| C | 0.519478  | 8.412278   | 0.000000  |
| C | -0.850724 | 8.999883   | 0.000000  |
| O | -1.847381 | 8.310212   | 0.000000  |
| O | -0.824361 | 10.325168  | 0.000000  |
| C | -2.104965 | 10.998842  | 0.000000  |
| H | -2.668765 | 10.725206  | 0.891155  |
| H | -1.866202 | 12.057811  | 0.000000  |
| H | -2.668765 | 10.725206  | -0.891155 |
| C | 1.649826  | 9.267661   | 0.000000  |
| N | 2.592695  | 9.938070   | 0.000000  |
| C | 0.850724  | -8.999883  | 0.000000  |
| O | 1.847381  | -8.310212  | 0.000000  |
| O | 0.824361  | -10.325168 | 0.000000  |
| C | 2.104965  | -10.998842 | 0.000000  |
| H | 2.668765  | -10.725206 | 0.891155  |
| H | 1.866202  | -12.057811 | 0.000000  |
| H | 2.668765  | -10.725206 | -0.891155 |

|   |           |           |          |
|---|-----------|-----------|----------|
| C | -1.649826 | -9.267661 | 0.000000 |
| N | -2.592695 | -9.938070 | 0.000000 |

**EsQ4-Anion: UB3LYP/6-311G\* geometry**

|   |           |           |           |
|---|-----------|-----------|-----------|
| C | 0.717468  | 7.105114  | 0.000000  |
| C | 1.957113  | 6.430416  | 0.000000  |
| C | 1.849543  | 5.049160  | 0.000000  |
| C | 0.533949  | 4.574257  | 0.000000  |
| S | -0.602994 | 5.937840  | 0.000000  |
| H | 2.895282  | 6.970339  | 0.000000  |
| H | 2.708578  | 4.387270  | 0.000000  |
| C | 0.078686  | 3.239782  | 0.000000  |
| C | -1.236499 | 2.761310  | 0.000000  |
| S | 1.199619  | 1.870721  | 0.000000  |
| C | -1.343797 | 1.372681  | 0.000000  |
| H | -2.091192 | 3.426662  | 0.000000  |
| C | -0.123180 | 0.696167  | 0.000000  |
| H | -2.293432 | 0.850436  | 0.000000  |
| C | 0.123180  | -0.696167 | 0.000000  |
| C | 1.343797  | -1.372681 | 0.000000  |
| S | -1.199619 | -1.870721 | 0.000000  |
| C | 1.236499  | -2.761310 | 0.000000  |
| H | 2.293432  | -0.850436 | 0.000000  |
| C | -0.078686 | -3.239782 | 0.000000  |
| H | 2.091192  | -3.426662 | 0.000000  |
| C | -0.533949 | -4.574257 | 0.000000  |
| C | -1.849543 | -5.049160 | 0.000000  |
| S | 0.602994  | -5.937840 | 0.000000  |
| C | -1.957113 | -6.430416 | 0.000000  |
| H | -2.708578 | -4.387270 | 0.000000  |
| C | -0.717468 | -7.105114 | 0.000000  |
| H | -2.895282 | -6.970339 | 0.000000  |
| C | -0.518831 | -8.500861 | 0.000000  |
| C | 0.518831  | 8.500861  | 0.000000  |
| C | -0.813630 | 9.066447  | 0.000000  |
| O | -1.849543 | 8.419380  | 0.000000  |
| O | -0.811271 | 10.429001 | 0.000000  |
| C | -2.100269 | 11.041376 | 0.000000  |
| H | -2.669982 | 10.755265 | 0.886678  |
| H | -1.912540 | 12.113803 | 0.000000  |
| H | -2.669982 | 10.755265 | -0.886678 |
| C | 1.650819  | 9.349420  | 0.000000  |
| N | 2.605459  | 10.008970 | 0.000000  |
| C | 0.813630  | -9.066447 | 0.000000  |
| O | 1.849543  | -8.419380 | 0.000000  |

|   |           |            |           |
|---|-----------|------------|-----------|
| O | 0.811271  | -10.429001 | 0.000000  |
| C | 2.100269  | -11.041376 | 0.000000  |
| H | 2.669982  | -10.755265 | 0.886678  |
| H | 1.912540  | -12.113803 | 0.000000  |
| H | 2.669982  | -10.755265 | -0.886678 |
| C | -1.650819 | -9.349420  | 0.000000  |
| N | -2.605459 | -10.008970 | 0.000000  |

**QDTBDT-Neutral: CS-B3LYP/6-311G\* geometry**

|   |           |           |           |
|---|-----------|-----------|-----------|
| C | 0.124501  | 5.278037  | 0.000000  |
| C | -1.199774 | 4.712430  | 0.000000  |
| C | -1.129356 | 3.337904  | 0.000000  |
| C | 0.176456  | 2.774722  | 0.000000  |
| S | 1.391734  | 4.022302  | 0.000000  |
| C | 0.219646  | 1.390250  | 0.000000  |
| C | -1.117845 | 0.831635  | 0.000000  |
| S | -2.370958 | 2.091705  | 0.000000  |
| C | 1.343192  | 0.513479  | 0.000000  |
| C | 1.117845  | -0.831635 | 0.000000  |
| C | -0.219646 | -1.390250 | 0.000000  |
| C | -1.343192 | -0.513479 | 0.000000  |
| C | -0.176456 | -2.774722 | 0.000000  |
| C | 1.129356  | -3.337904 | 0.000000  |
| S | 2.370958  | -2.091705 | 0.000000  |
| C | 1.199774  | -4.712430 | 0.000000  |
| C | -0.124501 | -5.278037 | 0.000000  |
| S | -1.391734 | -4.022302 | 0.000000  |
| C | 2.477404  | -5.498949 | 0.000000  |
| C | -0.513652 | -6.611209 | 0.000000  |
| C | -1.893155 | -6.954373 | 0.000000  |
| N | -3.022144 | -7.210028 | 0.000000  |
| C | -2.477404 | 5.498949  | 0.000000  |
| C | 0.513652  | 6.611209  | 0.000000  |
| C | 1.893155  | 6.954373  | 0.000000  |
| N | 3.022144  | 7.210028  | 0.000000  |
| C | -0.400531 | 7.697600  | 0.000000  |
| N | -1.117845 | 8.605911  | 0.000000  |
| C | 0.400531  | -7.697600 | 0.000000  |
| N | 1.117845  | -8.605911 | 0.000000  |
| H | 2.348415  | 0.920476  | 0.000000  |
| H | -2.348415 | -0.920476 | 0.000000  |
| H | 2.557777  | -6.144813 | 0.877224  |
| H | 2.557777  | -6.144813 | -0.877224 |
| H | 3.337683  | -4.827645 | 0.000000  |
| H | -2.557777 | 6.144813  | -0.877224 |

|   |           |          |          |
|---|-----------|----------|----------|
| H | -3.337683 | 4.827645 | 0.000000 |
| H | -2.557777 | 6.144813 | 0.877224 |

**QDTBDT-Neutral: BS-UB3LYP/6-311G\* geometry**

|   |           |           |           |
|---|-----------|-----------|-----------|
| C | 0.079608  | 5.288577  | 0.000000  |
| C | -1.230549 | 4.718004  | 0.000000  |
| C | -1.147525 | 3.331508  | 0.000000  |
| C | 0.152603  | 2.790822  | 0.000000  |
| S | 1.355333  | 4.045234  | 0.000000  |
| C | 0.209801  | 1.387677  | 0.000000  |
| C | -1.116294 | 0.827887  | 0.000000  |
| S | -2.378743 | 2.074813  | 0.000000  |
| C | 1.332795  | 0.528482  | 0.000000  |
| C | 1.116294  | -0.827887 | 0.000000  |
| C | -0.209801 | -1.387677 | 0.000000  |
| C | -1.332795 | -0.528482 | 0.000000  |
| C | -0.152603 | -2.790822 | 0.000000  |
| C | 1.147525  | -3.331508 | 0.000000  |
| S | 2.378743  | -2.074813 | 0.000000  |
| C | 1.230549  | -4.718004 | 0.000000  |
| C | -0.079608 | -5.288577 | 0.000000  |
| S | -1.355333 | -4.045234 | 0.000000  |
| C | 2.518909  | -5.487184 | 0.000000  |
| C | -0.461770 | -6.634442 | 0.000000  |
| C | -1.836244 | -6.989546 | 0.000000  |
| N | -2.962869 | -7.257620 | 0.000000  |
| C | -2.518909 | 5.487184  | 0.000000  |
| C | 0.461770  | 6.634442  | 0.000000  |
| C | 1.836244  | 6.989546  | 0.000000  |
| N | 2.962869  | 7.257620  | 0.000000  |
| C | -0.461770 | 7.709894  | 0.000000  |
| N | -1.191007 | 8.609515  | 0.000000  |
| C | 0.461770  | -7.709894 | 0.000000  |
| N | 1.191007  | -8.609515 | 0.000000  |
| H | 2.336072  | 0.940334  | 0.000000  |
| H | -2.336072 | -0.940334 | 0.000000  |
| H | 2.608159  | -6.131937 | 0.877222  |
| H | 2.608159  | -6.131937 | -0.877222 |
| H | 3.370273  | -4.804755 | 0.000000  |
| H | -2.608159 | 6.131937  | -0.877222 |
| H | -3.370273 | 4.804755  | 0.000000  |
| H | -2.608159 | 6.131937  | 0.877222  |

**QDTBDT-Cation: UB3LYP/6-311G\* geometry**

|   |           |           |           |
|---|-----------|-----------|-----------|
| C | 0.115787  | 5.264127  | 0.000000  |
| C | -1.213122 | 4.707214  | 0.000000  |
| C | -1.138707 | 3.325178  | 0.000000  |
| C | 0.171133  | 2.782330  | 0.000000  |
| S | 1.385792  | 4.011981  | 0.000000  |
| C | 0.216495  | 1.380044  | 0.000000  |
| C | -1.118648 | 0.834342  | 0.000000  |
| S | -2.376121 | 2.080998  | 0.000000  |
| C | 1.339963  | 0.520594  | 0.000000  |
| C | 1.118648  | -0.834342 | 0.000000  |
| C | -0.216495 | -1.380044 | 0.000000  |
| C | -1.339963 | -0.520594 | 0.000000  |
| C | -0.171133 | -2.782330 | 0.000000  |
| C | 1.138707  | -3.325178 | 0.000000  |
| S | 2.376121  | -2.080998 | 0.000000  |
| C | 1.213122  | -4.707214 | 0.000000  |
| C | -0.115787 | -5.264127 | 0.000000  |
| S | -1.385792 | -4.011981 | 0.000000  |
| C | 2.488394  | -5.489701 | 0.000000  |
| C | -0.503667 | -6.597183 | 0.000000  |
| C | -1.882752 | -6.944473 | 0.000000  |
| N | -3.010550 | -7.201736 | 0.000000  |
| C | -2.488394 | 5.489701  | 0.000000  |
| C | 0.503667  | 6.597183  | 0.000000  |
| C | 1.882752  | 6.944473  | 0.000000  |
| N | 3.010550  | 7.201736  | 0.000000  |
| C | -0.414357 | 7.679430  | 0.000000  |
| N | -1.138707 | 8.581314  | 0.000000  |
| C | 0.414357  | -7.679430 | 0.000000  |
| N | 1.138707  | -8.581314 | 0.000000  |
| H | 2.344111  | 0.929844  | 0.000000  |
| H | -2.344111 | -0.929844 | 0.000000  |
| H | 2.565533  | -6.136269 | 0.877576  |
| H | 2.565533  | -6.136269 | -0.877576 |
| H | 3.349943  | -4.821570 | 0.000000  |
| H | -2.565533 | 6.136269  | -0.877576 |
| H | -3.349943 | 4.821570  | 0.000000  |
| H | -2.565533 | 6.136269  | 0.877576  |

**QDTBDT-Anion: UB3LYP/6-311G\* geometry**

|   |           |          |          |
|---|-----------|----------|----------|
| C | 0.070343  | 5.319670 | 0.000000 |
| C | -1.220867 | 4.742416 | 0.000000 |
| C | -1.134221 | 3.346491 | 0.000000 |
| C | 0.152565  | 2.803387 | 0.000000 |
| S | 1.346846  | 4.075618 | 0.000000 |

|   |           |           |           |
|---|-----------|-----------|-----------|
| C | 0.213413  | 1.395257  | 0.000000  |
| C | -1.107296 | 0.830254  | 0.000000  |
| S | -2.367378 | 2.084438  | 0.000000  |
| C | 1.328262  | 0.527924  | 0.000000  |
| C | 1.107296  | -0.830254 | 0.000000  |
| C | -0.213413 | -1.395257 | 0.000000  |
| C | -1.328262 | -0.527924 | 0.000000  |
| C | -0.152565 | -2.803387 | 0.000000  |
| C | 1.134221  | -3.346491 | 0.000000  |
| S | 2.367378  | -2.084438 | 0.000000  |
| C | 1.220867  | -4.742416 | 0.000000  |
| C | -0.070343 | -5.319670 | 0.000000  |
| S | -1.346846 | -4.075618 | 0.000000  |
| C | 2.518169  | -5.502797 | 0.000000  |
| C | -0.460058 | -6.681008 | 0.000000  |
| C | -1.829606 | -7.034942 | 0.000000  |
| N | -2.957521 | -7.310652 | 0.000000  |
| C | -2.518169 | 5.502797  | 0.000000  |
| C | 0.460058  | 6.681008  | 0.000000  |
| C | 1.829606  | 7.034942  | 0.000000  |
| N | 2.957521  | 7.310652  | 0.000000  |
| C | -0.460058 | 7.754233  | 0.000000  |
| N | -1.188532 | 8.658445  | 0.000000  |
| C | 0.460058  | -7.754233 | 0.000000  |
| N | 1.188532  | -8.658445 | 0.000000  |
| H | 2.334373  | 0.934116  | 0.000000  |
| H | -2.334373 | -0.934116 | 0.000000  |
| H | 2.616769  | -6.147819 | 0.876496  |
| H | 2.616769  | -6.147819 | -0.876496 |
| H | 3.363584  | -4.811118 | 0.000000  |
| H | -2.616769 | 6.147819  | -0.876496 |
| H | -3.363584 | 4.811118  | 0.000000  |
| H | -2.616769 | 6.147819  | 0.876496  |

**TPQ-Neutral: CS-B3LYP/6-311G\* geometry**

|   |           |           |          |
|---|-----------|-----------|----------|
| N | -1.530066 | 10.618678 | 0.000000 |
| C | -0.711366 | 9.799057  | 0.000000 |
| C | 0.273999  | 8.779673  | 0.000000 |
| C | 1.629772  | 9.194416  | 0.000000 |
| N | 2.745118  | 9.507870  | 0.000000 |
| C | -0.072367 | 7.417516  | 0.000000 |
| C | -1.453748 | 7.011163  | 0.000000 |
| C | -1.816515 | 5.694111  | 0.000000 |
| C | -0.810755 | 4.693092  | 0.000000 |
| C | 0.576954  | 5.085787  | 0.000000 |

|   |           |            |           |
|---|-----------|------------|-----------|
| C | 0.939524  | 6.396146   | 0.000000  |
| H | 1.983612  | 6.690337   | 0.000000  |
| H | -2.216703 | 7.781070   | 0.000000  |
| H | -2.866133 | 5.418867   | 0.000000  |
| C | -0.866409 | 3.293652   | 0.000000  |
| C | 0.423000  | 2.747046   | 0.000000  |
| C | 1.453748  | 3.841190   | 0.000000  |
| H | 2.107272  | 3.802168   | 0.878609  |
| H | 2.107272  | 3.802168   | -0.878609 |
| C | -1.896343 | 2.199958   | 0.000000  |
| H | -2.549746 | 2.241960   | 0.878571  |
| H | -2.549746 | 2.241960   | -0.878571 |
| C | -1.023742 | 0.953962   | 0.000000  |
| C | 0.367935  | 1.344835   | 0.000000  |
| C | 1.394438  | 0.360977   | 0.000000  |
| H | 2.439109  | 0.656597   | 0.000000  |
| N | 1.530066  | -10.618678 | 0.000000  |
| C | 0.711366  | -9.799057  | 0.000000  |
| C | -0.273999 | -8.779673  | 0.000000  |
| C | -1.629772 | -9.194416  | 0.000000  |
| N | -2.745118 | -9.507870  | 0.000000  |
| C | 0.072367  | -7.417516  | 0.000000  |
| C | 1.453748  | -7.011163  | 0.000000  |
| C | 1.816515  | -5.694111  | 0.000000  |
| C | 0.810755  | -4.693092  | 0.000000  |
| C | -0.576954 | -5.085787  | 0.000000  |
| C | -0.939524 | -6.396146  | 0.000000  |
| H | -1.983612 | -6.690337  | 0.000000  |
| H | 2.216703  | -7.781070  | 0.000000  |
| H | 2.866133  | -5.418867  | 0.000000  |
| C | 0.866409  | -3.293652  | 0.000000  |
| C | -0.423000 | -2.747046  | 0.000000  |
| C | -1.453748 | -3.841190  | 0.000000  |
| H | -2.107272 | -3.802168  | -0.878609 |
| H | -2.107272 | -3.802168  | 0.878609  |
| C | 1.896343  | -2.199958  | 0.000000  |
| H | 2.549746  | -2.241960  | -0.878571 |
| H | 2.549746  | -2.241960  | 0.878571  |
| C | 1.023742  | -0.953962  | 0.000000  |
| C | -0.367935 | -1.344835  | 0.000000  |
| C | -1.394438 | -0.360977  | 0.000000  |
| H | -2.439109 | -0.656597  | 0.000000  |

**TPQ-Neutral: BS-UB3LYP/6-311G\* geometry**

|   |           |           |          |
|---|-----------|-----------|----------|
| N | -1.519396 | 10.657430 | 0.000000 |
|---|-----------|-----------|----------|

|   |           |            |           |
|---|-----------|------------|-----------|
| C | -0.702169 | 9.835342   | 0.000000  |
| C | 0.279293  | 8.816259   | 0.000000  |
| C | 1.632661  | 9.228725   | 0.000000  |
| N | 2.748502  | 9.543073   | 0.000000  |
| C | -0.074652 | 7.437699   | 0.000000  |
| C | -1.445504 | 7.039493   | 0.000000  |
| C | -1.810061 | 5.712167   | 0.000000  |
| C | -0.808885 | 4.722379   | 0.000000  |
| C | 0.570180  | 5.107981   | 0.000000  |
| C | 0.934106  | 6.425486   | 0.000000  |
| H | 1.979103  | 6.717237   | 0.000000  |
| H | -2.211196 | 7.806913   | 0.000000  |
| H | -2.859843 | 5.438092   | 0.000000  |
| C | -0.859769 | 3.297110   | 0.000000  |
| C | 0.412962  | 2.771862   | 0.000000  |
| C | 1.445504  | 3.863503   | 0.000000  |
| H | 2.099709  | 3.823902   | 0.878504  |
| H | 2.099709  | 3.823902   | -0.878504 |
| C | -1.888653 | 2.201910   | 0.000000  |
| H | -2.542976 | 2.241638   | 0.878518  |
| H | -2.542976 | 2.241638   | -0.878518 |
| C | -1.013193 | 0.957907   | 0.000000  |
| C | 0.364462  | 1.339712   | 0.000000  |
| C | 1.384850  | 0.369475   | 0.000000  |
| H | 2.430237  | 0.663419   | 0.000000  |
| N | 1.519396  | -10.657430 | 0.000000  |
| C | 0.702169  | -9.835342  | 0.000000  |
| C | -0.279293 | -8.816259  | 0.000000  |
| C | -1.632661 | -9.228725  | 0.000000  |
| N | -2.748502 | -9.543073  | 0.000000  |
| C | 0.074652  | -7.437699  | 0.000000  |
| C | 1.445504  | -7.039493  | 0.000000  |
| C | 1.810061  | -5.712167  | 0.000000  |
| C | 0.808885  | -4.722379  | 0.000000  |
| C | -0.570180 | -5.107981  | 0.000000  |
| C | -0.934106 | -6.425486  | 0.000000  |
| H | -1.979103 | -6.717237  | 0.000000  |
| H | 2.211196  | -7.806913  | 0.000000  |
| H | 2.859843  | -5.438092  | 0.000000  |
| C | 0.859769  | -3.297110  | 0.000000  |
| C | -0.412962 | -2.771862  | 0.000000  |
| C | -1.445504 | -3.863503  | 0.000000  |
| H | -2.099709 | -3.823902  | -0.878504 |
| H | -2.099709 | -3.823902  | 0.878504  |
| C | 1.888653  | -2.201910  | 0.000000  |
| H | 2.542976  | -2.241638  | -0.878518 |
| H | 2.542976  | -2.241638  | 0.878518  |

|   |           |           |          |
|---|-----------|-----------|----------|
| C | 1.013193  | -0.957907 | 0.000000 |
| C | -0.364462 | -1.339712 | 0.000000 |
| C | -1.384850 | -0.369475 | 0.000000 |
| H | -2.430237 | -0.663419 | 0.000000 |

**TPQ-Cation: UB3LYP/6-311G\* geometry**

|   |           |            |           |
|---|-----------|------------|-----------|
| N | -1.525363 | 10.616907  | 0.000000  |
| C | -0.710173 | 9.794922   | 0.000000  |
| C | 0.272795  | 8.773962   | 0.000000  |
| C | 1.627905  | 9.190184   | 0.000000  |
| N | 2.742132  | 9.504321   | 0.000000  |
| C | -0.074974 | 7.406498   | 0.000000  |
| C | -1.454695 | 7.009886   | 0.000000  |
| C | -1.816581 | 5.689065   | 0.000000  |
| C | -0.804521 | 4.699529   | 0.000000  |
| C | 0.581246  | 5.082723   | 0.000000  |
| C | 0.943420  | 6.396612   | 0.000000  |
| H | 1.986580  | 6.693095   | 0.000000  |
| H | -2.218467 | 7.778757   | 0.000000  |
| H | -2.864240 | 5.410049   | 0.000000  |
| C | -0.864026 | 3.287260   | 0.000000  |
| C | 0.420413  | 2.752879   | 0.000000  |
| C | 1.454695  | 3.839457   | 0.000000  |
| H | 2.108098  | 3.796064   | 0.878529  |
| H | 2.108098  | 3.796064   | -0.878529 |
| C | -1.896085 | 2.198331   | 0.000000  |
| H | -2.549651 | 2.240744   | 0.878457  |
| H | -2.549651 | 2.240744   | -0.878457 |
| C | -1.023141 | 0.955257   | 0.000000  |
| C | 0.364963  | 1.336169   | 0.000000  |
| C | 1.393713  | 0.365641   | 0.000000  |
| H | 2.437041  | 0.663681   | 0.000000  |
| N | 1.525363  | -10.616907 | 0.000000  |
| C | 0.710173  | -9.794922  | 0.000000  |
| C | -0.272795 | -8.773962  | 0.000000  |
| C | -1.627905 | -9.190184  | 0.000000  |
| N | -2.742132 | -9.504321  | 0.000000  |
| C | 0.074974  | -7.406498  | 0.000000  |
| C | 1.454695  | -7.009886  | 0.000000  |
| C | 1.816581  | -5.689065  | 0.000000  |
| C | 0.804521  | -4.699529  | 0.000000  |
| C | -0.581246 | -5.082723  | 0.000000  |
| C | -0.943420 | -6.396612  | 0.000000  |
| H | -1.986580 | -6.693095  | 0.000000  |
| H | 2.218467  | -7.778757  | 0.000000  |

|   |           |           |           |
|---|-----------|-----------|-----------|
| H | 2.864240  | -5.410049 | 0.000000  |
| C | 0.864026  | -3.287260 | 0.000000  |
| C | -0.420413 | -2.752879 | 0.000000  |
| C | -1.454695 | -3.839457 | 0.000000  |
| H | -2.108098 | -3.796064 | -0.878529 |
| H | -2.108098 | -3.796064 | 0.878529  |
| C | 1.896085  | -2.198331 | 0.000000  |
| H | 2.549651  | -2.240744 | -0.878457 |
| H | 2.549651  | -2.240744 | 0.878457  |
| C | 1.023141  | -0.955257 | 0.000000  |
| C | -0.364963 | -1.336169 | 0.000000  |
| C | -1.393713 | -0.365641 | 0.000000  |
| H | -2.437041 | -0.663681 | 0.000000  |

**TPO-Anion: UB3LYP/6-311G\* geometry**

|   |           |           |           |
|---|-----------|-----------|-----------|
| N | 6.643221  | 8.502344  | 0.000000  |
| C | 6.622644  | 7.340565  | 0.000000  |
| C | 6.571608  | 5.929905  | 0.000000  |
| C | 7.802017  | 5.238369  | 0.000000  |
| N | 8.802928  | 4.647986  | 0.000000  |
| C | 5.324819  | 5.227500  | 0.000000  |
| C | 4.084859  | 5.931198  | 0.000000  |
| C | 2.872261  | 5.273367  | 0.000000  |
| C | 2.843178  | 3.868066  | 0.000000  |
| C | 4.078297  | 3.148369  | 0.000000  |
| C | 5.282818  | 3.800286  | 0.000000  |
| H | 6.215886  | 3.245463  | 0.000000  |
| H | 4.105366  | 7.015569  | 0.000000  |
| H | 1.948709  | 5.845248  | 0.000000  |
| C | 1.784607  | 2.910151  | 0.000000  |
| C | 2.286128  | 1.628898  | 0.000000  |
| C | 3.791270  | 1.651009  | 0.000000  |
| H | 4.219954  | 1.154088  | 0.878468  |
| H | 4.219954  | 1.154088  | -0.878468 |
| C | 0.280574  | 2.887166  | 0.000000  |
| H | -0.145576 | 3.386294  | 0.878503  |
| H | -0.145576 | 3.386294  | -0.878503 |
| C | -0.010343 | 1.392368  | 0.000000  |
| C | 1.224226  | 0.669994  | 0.000000  |
| C | 1.224226  | -0.740486 | 0.000000  |
| H | 2.159965  | -1.293079 | 0.000000  |
| N | -6.643221 | -8.502344 | 0.000000  |
| C | -6.622644 | -7.340565 | 0.000000  |
| C | -6.571608 | -5.929905 | 0.000000  |
| C | -7.802017 | -5.238369 | 0.000000  |

|   |           |           |           |
|---|-----------|-----------|-----------|
| N | -8.802928 | -4.647986 | 0.000000  |
| C | -5.324819 | -5.227500 | 0.000000  |
| C | -4.084859 | -5.931198 | 0.000000  |
| C | -2.872261 | -5.273367 | 0.000000  |
| C | -2.843178 | -3.868066 | 0.000000  |
| C | -4.078297 | -3.148369 | 0.000000  |
| C | -5.282818 | -3.800286 | 0.000000  |
| H | -6.215886 | -3.245463 | 0.000000  |
| H | -4.105366 | -7.015569 | 0.000000  |
| H | -1.948709 | -5.845248 | 0.000000  |
| C | -1.784607 | -2.910151 | 0.000000  |
| C | -2.286128 | -1.628898 | 0.000000  |
| C | -3.791270 | -1.651009 | 0.000000  |
| H | -4.219954 | -1.154088 | -0.878468 |
| H | -4.219954 | -1.154088 | 0.878468  |
| C | -0.280574 | -2.887166 | 0.000000  |
| H | 0.145576  | -3.386294 | -0.878503 |
| H | 0.145576  | -3.386294 | 0.878503  |
| C | 0.010343  | -1.392368 | 0.000000  |
| C | -1.224226 | -0.669994 | 0.000000  |
| C | -1.224226 | 0.740486  | 0.000000  |
| H | -2.159965 | 1.293079  | 0.000000  |

**NZ-Neutral: CS-B3LYP/6-311G\* geometry**

|   |           |           |          |
|---|-----------|-----------|----------|
| C | 8.598774  | 0.669978  | 0.000000 |
| C | 8.641021  | -0.706928 | 0.000000 |
| C | 7.442929  | -1.471163 | 0.000000 |
| C | 6.183066  | -0.796608 | 0.000000 |
| C | 6.161408  | 0.638261  | 0.000000 |
| C | 7.368157  | 1.341289  | 0.000000 |
| H | 7.345832  | 2.426890  | 0.000000 |
| C | 4.903983  | 1.309686  | 0.000000 |
| C | 3.700516  | 0.638034  | 0.000000 |
| C | 3.677165  | -0.825765 | 0.000000 |
| C | 4.966367  | -1.543707 | 0.000000 |
| H | 4.901916  | 2.396341  | 0.000000 |
| C | 2.462110  | 1.343896  | 0.000000 |
| C | 1.241136  | 0.705524  | 0.000000 |
| C | 1.212972  | -0.752301 | 0.000000 |
| C | 2.462110  | -1.454813 | 0.000000 |
| H | 2.495051  | 2.430251  | 0.000000 |
| H | 2.404526  | -2.537831 | 0.000000 |
| C | -0.001910 | 1.406443  | 0.000000 |
| C | -1.212972 | 0.752301  | 0.000000 |
| C | -1.241136 | -0.705524 | 0.000000 |

|   |           |           |          |
|---|-----------|-----------|----------|
| C | 0.001910  | -1.406443 | 0.000000 |
| H | 0.019078  | 2.493220  | 0.000000 |
| H | -0.019078 | -2.493220 | 0.000000 |
| C | -2.462110 | 1.454813  | 0.000000 |
| C | -3.677165 | 0.825765  | 0.000000 |
| C | -3.700516 | -0.638034 | 0.000000 |
| C | -2.462110 | -1.343896 | 0.000000 |
| H | -2.404526 | 2.537831  | 0.000000 |
| H | -2.495051 | -2.430251 | 0.000000 |
| C | -4.966367 | 1.543707  | 0.000000 |
| C | -6.183066 | 0.796608  | 0.000000 |
| C | -6.161408 | -0.638261 | 0.000000 |
| C | -4.903983 | -1.309686 | 0.000000 |
| H | -4.901916 | -2.396341 | 0.000000 |
| C | -7.368157 | -1.341289 | 0.000000 |
| C | -8.598774 | -0.669978 | 0.000000 |
| H | -9.521201 | -1.241862 | 0.000000 |
| C | -8.641021 | 0.706928  | 0.000000 |
| H | -9.593388 | 1.228051  | 0.000000 |
| C | -7.442929 | 1.471163  | 0.000000 |
| H | -7.345832 | -2.426890 | 0.000000 |
| C | -5.052212 | 2.935209  | 0.000000 |
| C | -7.465710 | 2.884937  | 0.000000 |
| C | -6.287033 | 3.597599  | 0.000000 |
| H | -4.151250 | 3.536700  | 0.000000 |
| H | -6.306808 | 4.682742  | 0.000000 |
| H | -8.422106 | 3.398852  | 0.000000 |
| H | 9.593388  | -1.228051 | 0.000000 |
| H | 9.521201  | 1.241862  | 0.000000 |
| C | 5.052212  | -2.935209 | 0.000000 |
| C | 7.465710  | -2.884937 | 0.000000 |
| C | 6.287033  | -3.597599 | 0.000000 |
| H | 6.306808  | -4.682742 | 0.000000 |
| H | 8.422106  | -3.398852 | 0.000000 |
| H | 4.151250  | -3.536700 | 0.000000 |

**NZ-Neutral: BS-UB3LYP/6-311G\* geometry**

|   |          |           |          |
|---|----------|-----------|----------|
| C | 8.599021 | 0.732472  | 0.000000 |
| C | 8.644066 | -0.646898 | 0.000000 |
| C | 7.447164 | -1.415337 | 0.000000 |
| C | 6.184912 | -0.745371 | 0.000000 |
| C | 6.158469 | 0.692700  | 0.000000 |
| C | 7.370353 | 1.400744  | 0.000000 |
| H | 7.345006 | 2.486198  | 0.000000 |
| C | 4.909310 | 1.357590  | 0.000000 |

|   |           |           |          |
|---|-----------|-----------|----------|
| C | 3.691933  | 0.671587  | 0.000000 |
| C | 3.681605  | -0.786252 | 0.000000 |
| C | 4.972153  | -1.496493 | 0.000000 |
| H | 4.899160  | 2.443953  | 0.000000 |
| C | 2.465934  | 1.367402  | 0.000000 |
| C | 1.232028  | 0.714289  | 0.000000 |
| C | 1.219672  | -0.736297 | 0.000000 |
| C | 2.465934  | -1.428519 | 0.000000 |
| H | 2.488448  | 2.453899  | 0.000000 |
| H | 2.418709  | -2.511832 | 0.000000 |
| C | -0.001541 | 1.404854  | 0.000000 |
| C | -1.219672 | 0.736297  | 0.000000 |
| C | -1.232028 | -0.714289 | 0.000000 |
| C | 0.001541  | -1.404854 | 0.000000 |
| H | 0.008837  | 2.491711  | 0.000000 |
| H | -0.008837 | -2.491711 | 0.000000 |
| C | -2.465934 | 1.428519  | 0.000000 |
| C | -3.681605 | 0.786252  | 0.000000 |
| C | -3.691933 | -0.671587 | 0.000000 |
| C | -2.465934 | -1.367402 | 0.000000 |
| H | -2.418709 | 2.511832  | 0.000000 |
| H | -2.488448 | -2.453899 | 0.000000 |
| C | -4.972153 | 1.496493  | 0.000000 |
| C | -6.184912 | 0.745371  | 0.000000 |
| C | -6.158469 | -0.692700 | 0.000000 |
| C | -4.909310 | -1.357590 | 0.000000 |
| H | -4.899160 | -2.443953 | 0.000000 |
| C | -7.370353 | -1.400744 | 0.000000 |
| C | -8.599021 | -0.732472 | 0.000000 |
| H | -9.520897 | -1.305344 | 0.000000 |
| C | -8.644066 | 0.646898  | 0.000000 |
| H | -9.597639 | 1.165749  | 0.000000 |
| C | -7.447164 | 1.415337  | 0.000000 |
| H | -7.345006 | -2.486198 | 0.000000 |
| C | -5.062860 | 2.890422  | 0.000000 |
| C | -7.475718 | 2.827977  | 0.000000 |
| C | -6.298783 | 3.546692  | 0.000000 |
| H | -4.164163 | 3.495052  | 0.000000 |
| H | -6.323737 | 4.631759  | 0.000000 |
| H | -8.434143 | 3.338116  | 0.000000 |
| H | 9.597639  | -1.165749 | 0.000000 |
| H | 9.520897  | 1.305344  | 0.000000 |
| C | 5.062860  | -2.890422 | 0.000000 |
| C | 7.475718  | -2.827977 | 0.000000 |
| C | 6.298783  | -3.546692 | 0.000000 |
| H | 6.323737  | -4.631759 | 0.000000 |
| H | 8.434143  | -3.338116 | 0.000000 |

|   |          |           |          |
|---|----------|-----------|----------|
| H | 4.164163 | -3.495052 | 0.000000 |
|---|----------|-----------|----------|

**NZ-Cation: UB3LYP/6-311G\* geometry**

|   |           |           |          |
|---|-----------|-----------|----------|
| C | 8.574138  | 0.759058  | 0.000000 |
| C | 8.622136  | -0.623565 | 0.000000 |
| C | 7.437146  | -1.405654 | 0.000000 |
| C | 6.170659  | -0.749306 | 0.000000 |
| C | 6.137762  | 0.686383  | 0.000000 |
| C | 7.341560  | 1.412293  | 0.000000 |
| H | 7.303690  | 2.496826  | 0.000000 |
| C | 4.890881  | 1.343880  | 0.000000 |
| C | 3.678779  | 0.650597  | 0.000000 |
| C | 3.674520  | -0.808583 | 0.000000 |
| C | 4.968230  | -1.508517 | 0.000000 |
| H | 4.873869  | 2.429822  | 0.000000 |
| C | 2.459962  | 1.356581  | 0.000000 |
| C | 1.228115  | 0.705394  | 0.000000 |
| C | 1.217540  | -0.747404 | 0.000000 |
| C | 2.459962  | -1.448425 | 0.000000 |
| H | 2.488180  | 2.442092  | 0.000000 |
| H | 2.407993  | -2.530875 | 0.000000 |
| C | 0.001232  | 1.408647  | 0.000000 |
| C | -1.217540 | 0.747404  | 0.000000 |
| C | -1.228115 | -0.705394 | 0.000000 |
| C | -0.001232 | -1.408647 | 0.000000 |
| H | 0.021905  | 2.494404  | 0.000000 |
| H | -0.021905 | -2.494404 | 0.000000 |
| C | -2.459962 | 1.448425  | 0.000000 |
| C | -3.674520 | 0.808583  | 0.000000 |
| C | -3.678779 | -0.650597 | 0.000000 |
| C | -2.459962 | -1.356581 | 0.000000 |
| H | -2.407993 | 2.530875  | 0.000000 |
| H | -2.488180 | -2.442092 | 0.000000 |
| C | -4.968230 | 1.508517  | 0.000000 |
| C | -6.170659 | 0.749306  | 0.000000 |
| C | -6.137762 | -0.686383 | 0.000000 |
| C | -4.890881 | -1.343880 | 0.000000 |
| H | -4.873869 | -2.429822 | 0.000000 |
| C | -7.341560 | -1.412293 | 0.000000 |
| C | -8.574138 | -0.759058 | 0.000000 |
| H | -9.492055 | -1.335440 | 0.000000 |
| C | -8.622136 | 0.623565  | 0.000000 |
| H | -9.580768 | 1.132275  | 0.000000 |

|   |           |           |          |
|---|-----------|-----------|----------|
| C | -7.437146 | 1.405654  | 0.000000 |
| H | -7.303690 | -2.496826 | 0.000000 |
| C | -5.074167 | 2.901941  | 0.000000 |
| C | -7.484946 | 2.817698  | 0.000000 |
| C | -6.315139 | 3.548626  | 0.000000 |
| H | -4.182202 | 3.516338  | 0.000000 |
| H | -6.349900 | 4.632267  | 0.000000 |
| H | -8.447706 | 3.317719  | 0.000000 |
| H | 9.580768  | -1.132275 | 0.000000 |
| H | 9.492055  | 1.335440  | 0.000000 |
| C | 5.074167  | -2.901941 | 0.000000 |
| C | 7.484946  | -2.817698 | 0.000000 |
| C | 6.315139  | -3.548626 | 0.000000 |
| H | 6.349900  | -4.632267 | 0.000000 |
| H | 8.447706  | -3.317719 | 0.000000 |
| H | 4.182202  | -3.516338 | 0.000000 |

**NZ-Anion: UB3LYP/6-311G\* geometry**

|   |           |           |          |
|---|-----------|-----------|----------|
| C | 8.615988  | 0.708740  | 0.000000 |
| C | 8.660852  | -0.673521 | 0.000000 |
| C | 7.456398  | -1.428583 | 0.000000 |
| C | 6.194432  | -0.747468 | 0.000000 |
| C | 6.170233  | 0.696699  | 0.000000 |
| C | 7.397682  | 1.389326  | 0.000000 |
| H | 7.383698  | 2.476008  | 0.000000 |
| C | 4.927201  | 1.364289  | 0.000000 |
| C | 3.703969  | 0.688576  | 0.000000 |
| C | 3.686573  | -0.772198 | 0.000000 |
| C | 4.975453  | -1.491049 | 0.000000 |
| H | 4.922852  | 2.451819  | 0.000000 |
| C | 2.471095  | 1.374266  | 0.000000 |
| C | 1.237615  | 0.723321  | 0.000000 |
| C | 1.219488  | -0.730259 | 0.000000 |
| C | 2.471095  | -1.415173 | 0.000000 |
| H | 2.489154  | 2.462210  | 0.000000 |
| H | 2.426610  | -2.499390 | 0.000000 |
| C | -0.004536 | 1.402419  | 0.000000 |
| C | -1.219488 | 0.730259  | 0.000000 |
| C | -1.237615 | -0.723321 | 0.000000 |
| C | 0.004536  | -1.402419 | 0.000000 |
| H | -0.002519 | 2.490629  | 0.000000 |
| H | 0.002519  | -2.490629 | 0.000000 |
| C | -2.471095 | 1.415173  | 0.000000 |
| C | -3.686573 | 0.772198  | 0.000000 |
| C | -3.703969 | -0.688576 | 0.000000 |

|   |           |           |          |
|---|-----------|-----------|----------|
| C | -2.471095 | -1.374266 | 0.000000 |
| H | -2.426610 | 2.499390  | 0.000000 |
| H | -2.489154 | -2.462210 | 0.000000 |
| C | -4.975453 | 1.491049  | 0.000000 |
| C | -6.194432 | 0.747468  | 0.000000 |
| C | -6.170233 | -0.696699 | 0.000000 |
| C | -4.927201 | -1.364289 | 0.000000 |
| H | -4.922852 | -2.451819 | 0.000000 |
| C | -7.397682 | -1.389326 | 0.000000 |
| C | -8.615988 | -0.708740 | 0.000000 |
| H | -9.543064 | -1.277431 | 0.000000 |
| C | -8.660852 | 0.673521  | 0.000000 |
| H | -9.611566 | 1.199222  | 0.000000 |
| C | -7.456398 | 1.428583  | 0.000000 |
| H | -7.383698 | -2.476008 | 0.000000 |
| C | -5.052806 | 2.888603  | 0.000000 |
| C | -7.467398 | 2.843156  | 0.000000 |
| C | -6.283771 | 3.551821  | 0.000000 |
| H | -4.148171 | 3.484420  | 0.000000 |
| H | -6.301320 | 4.638664  | 0.000000 |
| H | -8.422314 | 3.362502  | 0.000000 |
| H | 9.611566  | -1.199222 | 0.000000 |
| H | 9.543064  | 1.277431  | 0.000000 |
| C | 5.052806  | -2.888603 | 0.000000 |
| C | 7.467398  | -2.843156 | 0.000000 |
| C | 6.283771  | -3.551821 | 0.000000 |
| H | 6.301320  | -4.638664 | 0.000000 |
| H | 8.422314  | -3.362502 | 0.000000 |
| H | 4.148171  | -3.484420 | 0.000000 |

**Ph<sub>2</sub>-IDPL-Neutral: CS-B3LYP/6-311G\* geometry**

|   |           |           |           |
|---|-----------|-----------|-----------|
| C | -1.109102 | 0.141698  | -0.921942 |
| C | -0.943763 | -1.026085 | -0.167205 |
| C | 0.168041  | -1.169681 | 0.757752  |
| C | 0.065698  | -2.471067 | 1.380480  |
| C | 0.794772  | -3.218791 | 2.339659  |
| C | 0.366259  | -4.484461 | 2.694947  |
| C | -0.802930 | -5.099450 | 2.133790  |
| C | -1.280545 | -6.378733 | 2.459798  |
| C | -2.435981 | -6.904165 | 1.861365  |
| C | -3.136323 | -6.144570 | 0.919014  |
| C | -2.708517 | -4.854934 | 0.549458  |
| C | -3.362973 | -4.009029 | -0.404042 |
| C | -2.900210 | -2.746124 | -0.731850 |
| C | -1.730672 | -2.242780 | -0.111899 |

|   |           |           |           |
|---|-----------|-----------|-----------|
| C | -1.087597 | -3.080004 | 0.828832  |
| C | -1.535825 | -4.352441 | 1.172070  |
| C | -2.251297 | 0.289327  | -1.872751 |
| C | -3.466891 | 0.834093  | -1.444718 |
| C | -4.532407 | 0.972143  | -2.332101 |
| C | -4.396015 | 0.567246  | -3.658882 |
| C | -3.188425 | 0.023474  | -4.093512 |
| C | -2.122892 | -0.114620 | -3.206140 |
| C | -2.907761 | -8.290653 | 2.234996  |
| H | 1.686259  | -2.812931 | 2.801330  |
| H | 0.936197  | -5.044016 | 3.431512  |
| H | -0.744481 | -6.977278 | 3.192632  |
| H | -4.031115 | -6.559086 | 0.461799  |
| H | -4.261753 | -4.380470 | -0.888466 |
| H | -3.441839 | -2.157186 | -1.461577 |
| H | -3.574197 | 1.149616  | -0.412104 |
| H | -5.469609 | 1.396419  | -1.985864 |
| H | -5.225915 | 0.674718  | -4.350034 |
| H | -3.074308 | -0.294352 | -5.125109 |
| H | -1.183281 | -0.538046 | -3.545548 |
| H | -3.029952 | -8.394272 | 3.317384  |
| H | -3.866811 | -8.527504 | 1.770033  |
| H | -2.190734 | -9.055060 | 1.918009  |
| C | 1.109102  | -0.141698 | 0.921942  |
| C | 0.943763  | 1.026085  | 0.167205  |
| C | -0.168041 | 1.169681  | -0.757752 |
| C | -0.065698 | 2.471067  | -1.380480 |
| C | -0.794772 | 3.218791  | -2.339659 |
| C | -0.366259 | 4.484461  | -2.694947 |
| C | 0.802930  | 5.099450  | -2.133790 |
| C | 1.280545  | 6.378733  | -2.459798 |
| C | 2.435981  | 6.904165  | -1.861365 |
| C | 3.136323  | 6.144570  | -0.919014 |
| C | 2.708517  | 4.854934  | -0.549458 |
| C | 3.362973  | 4.009029  | 0.404042  |
| C | 2.900210  | 2.746124  | 0.731850  |
| C | 1.730672  | 2.242780  | 0.111899  |
| C | 1.087597  | 3.080004  | -0.828832 |
| C | 1.535825  | 4.352441  | -1.172070 |
| C | 2.251297  | -0.289327 | 1.872751  |
| C | 3.466891  | -0.834093 | 1.444718  |
| C | 4.532407  | -0.972143 | 2.332101  |
| C | 4.396015  | -0.567246 | 3.658882  |
| C | 3.188425  | -0.023474 | 4.093512  |
| C | 2.122892  | 0.114620  | 3.206140  |
| C | 2.907761  | 8.290653  | -2.234996 |
| H | -1.686259 | 2.812931  | -2.801330 |

|   |           |           |           |
|---|-----------|-----------|-----------|
| H | -0.936197 | 5.044016  | -3.431512 |
| H | 0.744481  | 6.977278  | -3.192632 |
| H | 4.031115  | 6.559086  | -0.461799 |
| H | 4.261753  | 4.380470  | 0.888466  |
| H | 3.441839  | 2.157186  | 1.461577  |
| H | 3.574197  | -1.149616 | 0.412104  |
| H | 5.469609  | -1.396419 | 1.985864  |
| H | 5.225915  | -0.674718 | 4.350034  |
| H | 3.074308  | 0.294352  | 5.125109  |
| H | 1.183281  | 0.538046  | 3.545548  |
| H | 3.029952  | 8.394272  | -3.317384 |
| H | 3.866811  | 8.527504  | -1.770033 |
| H | 2.190734  | 9.055060  | -1.918009 |

**Ph<sub>2</sub>-IDPL-Neutral: BS-UB3LYP/6-311G\* geometry**

|   |           |           |           |
|---|-----------|-----------|-----------|
| C | -1.107512 | 0.141774  | -0.920764 |
| C | -0.940383 | -1.025057 | -0.165091 |
| C | 0.166401  | -1.167737 | 0.755540  |
| C | 0.063620  | -2.478100 | 1.382754  |
| C | 0.791462  | -3.220672 | 2.338241  |
| C | 0.362851  | -4.491215 | 2.696073  |
| C | -0.803871 | -5.104390 | 2.135854  |
| C | -1.283047 | -6.386048 | 2.461964  |
| C | -2.438545 | -6.910623 | 1.862990  |
| C | -3.138899 | -6.151124 | 0.920675  |
| C | -2.710399 | -4.859291 | 0.550464  |
| C | -3.363521 | -4.015032 | -0.401188 |
| C | -2.897543 | -2.748081 | -0.728703 |
| C | -1.732092 | -2.249088 | -0.109516 |
| C | -1.088880 | -3.085404 | 0.830843  |
| C | -1.537227 | -4.357481 | 1.173825  |
| C | -2.250277 | 0.289082  | -1.871850 |
| C | -3.466496 | 0.833341  | -1.444447 |
| C | -4.532271 | 0.971190  | -2.331608 |
| C | -4.395864 | 0.566453  | -3.658432 |
| C | -3.188068 | 0.023160  | -4.093107 |
| C | -2.122579 | -0.114526 | -3.205591 |
| C | -2.910641 | -8.297007 | 2.236234  |
| H | 1.683009  | -2.814175 | 2.799598  |
| H | 0.933709  | -5.049575 | 3.432728  |
| H | -0.747174 | -6.984726 | 3.194721  |
| H | -4.033714 | -6.565262 | 0.463265  |
| H | -4.262382 | -4.384946 | -0.886486 |
| H | -3.438596 | -2.158393 | -1.458441 |

|   |           |           |           |
|---|-----------|-----------|-----------|
| H | -3.574100 | 1.148861  | -0.411801 |
| H | -5.469609 | 1.395164  | -1.985313 |
| H | -5.225872 | 0.673722  | -4.349529 |
| H | -3.073888 | -0.294512 | -5.124766 |
| H | -1.182864 | -0.537633 | -3.545299 |
| H | -3.031826 | -8.401074 | 3.318666  |
| H | -3.870244 | -8.533208 | 1.771999  |
| H | -2.194108 | -9.061412 | 1.918285  |
| C | 1.107512  | -0.141774 | 0.920764  |
| C | 0.940383  | 1.025057  | 0.165091  |
| C | -0.166401 | 1.167737  | -0.755540 |
| C | -0.063620 | 2.478100  | -1.382754 |
| C | -0.791462 | 3.220672  | -2.338241 |
| C | -0.362851 | 4.491215  | -2.696073 |
| C | 0.803871  | 5.104390  | -2.135854 |
| C | 1.283047  | 6.386048  | -2.461964 |
| C | 2.438545  | 6.910623  | -1.862990 |
| C | 3.138899  | 6.151124  | -0.920675 |
| C | 2.710399  | 4.859291  | -0.550464 |
| C | 3.363521  | 4.015032  | 0.401188  |
| C | 2.897543  | 2.748081  | 0.728703  |
| C | 1.732092  | 2.249088  | 0.109516  |
| C | 1.088880  | 3.085404  | -0.830843 |
| C | 1.537227  | 4.357481  | -1.173825 |
| C | 2.250277  | -0.289082 | 1.871850  |
| C | 3.466496  | -0.833341 | 1.444447  |
| C | 4.532271  | -0.971190 | 2.331608  |
| C | 4.395864  | -0.566453 | 3.658432  |
| C | 3.188068  | -0.023160 | 4.093107  |
| C | 2.122579  | 0.114526  | 3.205591  |
| C | 2.910641  | 8.297007  | -2.236234 |
| H | -1.683009 | 2.814175  | -2.799598 |
| H | -0.933709 | 5.049575  | -3.432728 |
| H | 0.747174  | 6.984726  | -3.194721 |
| H | 4.033714  | 6.565262  | -0.463265 |
| H | 4.262382  | 4.384946  | 0.886486  |
| H | 3.438596  | 2.158393  | 1.458441  |
| H | 3.574100  | -1.148861 | 0.411801  |
| H | 5.469609  | -1.395164 | 1.985313  |
| H | 5.225872  | -0.673722 | 4.349529  |
| H | 3.073888  | 0.294512  | 5.124766  |
| H | 1.182864  | 0.537633  | 3.545299  |
| H | 3.031826  | 8.401074  | -3.318666 |
| H | 3.870244  | 8.533208  | -1.771999 |
| H | 2.194108  | 9.061412  | -1.918285 |

**Ph<sub>2</sub>-IDPL-Cation: UB3LYP/6-311G\* geometry**

|   |           |           |           |
|---|-----------|-----------|-----------|
| C | -1.110363 | 0.142582  | -0.923346 |
| C | -0.935095 | -1.021287 | -0.163081 |
| C | 0.163655  | -1.162969 | 0.750839  |
| C | 0.060574  | -2.482816 | 1.382798  |
| C | 0.790446  | -3.216647 | 2.334916  |
| C | 0.357569  | -4.492498 | 2.692240  |
| C | -0.805399 | -5.101016 | 2.132483  |
| C | -1.284852 | -6.385581 | 2.459696  |
| C | -2.440154 | -6.915370 | 1.863755  |
| C | -3.137344 | -6.151004 | 0.921416  |
| C | -2.707291 | -4.856924 | 0.551373  |
| C | -3.359726 | -4.017016 | -0.397326 |
| C | -2.894084 | -2.744127 | -0.728204 |
| C | -1.732815 | -2.253301 | -0.107825 |
| C | -1.089973 | -3.087937 | 0.831242  |
| C | -1.537207 | -4.356812 | 1.173322  |
| C | -2.252411 | 0.289974  | -1.873952 |
| C | -3.467135 | 0.834800  | -1.442283 |
| C | -4.532130 | 0.972117  | -2.330792 |
| C | -4.394124 | 0.566979  | -3.657479 |
| C | -3.186806 | 0.023448  | -4.093640 |
| C | -2.120317 | -0.114953 | -3.207107 |
| C | -2.911247 | -8.299923 | 2.238365  |
| H | 1.681268  | -2.810727 | 2.795959  |
| H | 0.929185  | -5.049212 | 3.428478  |
| H | -0.748194 | -6.982712 | 3.192083  |
| H | -4.031794 | -6.563450 | 0.463553  |
| H | -4.258150 | -4.385028 | -0.883241 |
| H | -3.435013 | -2.155249 | -1.457303 |
| H | -3.577549 | 1.151047  | -0.410084 |
| H | -5.469332 | 1.395730  | -1.985529 |
| H | -5.223613 | 0.674232  | -4.348216 |
| H | -3.073496 | -0.293760 | -5.124920 |
| H | -1.181661 | -0.538448 | -3.549465 |
| H | -3.031175 | -8.400062 | 3.320332  |
| H | -3.869527 | -8.538341 | 1.774970  |
| H | -2.192161 | -9.060694 | 1.920611  |
| C | 1.110363  | -0.142582 | 0.923346  |
| C | 0.935095  | 1.021287  | 0.163081  |
| C | -0.163655 | 1.162969  | -0.750839 |
| C | -0.060574 | 2.482816  | -1.382798 |
| C | -0.790446 | 3.216647  | -2.334916 |
| C | -0.357569 | 4.492498  | -2.692240 |
| C | 0.805399  | 5.101016  | -2.132483 |

|   |           |           |           |
|---|-----------|-----------|-----------|
| C | 1.284852  | 6.385581  | -2.459696 |
| C | 2.440154  | 6.915370  | -1.863755 |
| C | 3.137344  | 6.151004  | -0.921416 |
| C | 2.707291  | 4.856924  | -0.551373 |
| C | 3.359726  | 4.017016  | 0.397326  |
| C | 2.894084  | 2.744127  | 0.728204  |
| C | 1.732815  | 2.253301  | 0.107825  |
| C | 1.089973  | 3.087937  | -0.831242 |
| C | 1.537207  | 4.356812  | -1.173322 |
| C | 2.252411  | -0.289974 | 1.873952  |
| C | 3.467135  | -0.834800 | 1.442283  |
| C | 4.532130  | -0.972117 | 2.330792  |
| C | 4.394124  | -0.566979 | 3.657479  |
| C | 3.186806  | -0.023448 | 4.093640  |
| C | 2.120317  | 0.114953  | 3.207107  |
| C | 2.911247  | 8.299923  | -2.238365 |
| H | -1.681268 | 2.810727  | -2.795959 |
| H | -0.929185 | 5.049212  | -3.428478 |
| H | 0.748194  | 6.982712  | -3.192083 |
| H | 4.031794  | 6.563450  | -0.463553 |
| H | 4.258150  | 4.385028  | 0.883241  |
| H | 3.435013  | 2.155249  | 1.457303  |
| H | 3.577549  | -1.151047 | 0.410084  |
| H | 5.469332  | -1.395730 | 1.985529  |
| H | 5.223613  | -0.674232 | 4.348216  |
| H | 3.073496  | 0.293760  | 5.124920  |
| H | 1.181661  | 0.538448  | 3.549465  |
| H | 3.031175  | 8.400062  | -3.320332 |
| H | 3.869527  | 8.538341  | -1.774970 |
| H | 2.192161  | 9.060694  | -1.920611 |

**Ph<sub>2</sub>-IDPL-Anion: UB3LYP/6-311G\* geometry**

|   |           |           |           |
|---|-----------|-----------|-----------|
| C | -1.101832 | 0.139158  | -0.922149 |
| C | -0.944398 | -1.032318 | -0.166767 |
| C | 0.166698  | -1.172663 | 0.763104  |
| C | 0.062883  | -2.477716 | 1.390929  |
| C | 0.782512  | -3.223626 | 2.351021  |
| C | 0.356019  | -4.493238 | 2.713501  |
| C | -0.807459 | -5.109686 | 2.150479  |
| C | -1.291525 | -6.392143 | 2.478973  |
| C | -2.442431 | -6.912403 | 1.875201  |
| C | -3.144959 | -6.158094 | 0.927978  |
| C | -2.715861 | -4.868683 | 0.553424  |
| C | -3.366443 | -4.023139 | -0.401798 |
| C | -2.896544 | -2.759008 | -0.728039 |

|   |           |           |           |
|---|-----------|-----------|-----------|
| C | -1.731625 | -2.251064 | -0.110811 |
| C | -1.089133 | -3.087613 | 0.835321  |
| C | -1.538981 | -4.362765 | 1.180404  |
| C | -2.241948 | 0.283222  | -1.876759 |
| C | -3.461193 | 0.829179  | -1.459313 |
| C | -4.525443 | 0.964504  | -2.348699 |
| C | -4.387497 | 0.554942  | -3.673949 |
| C | -3.178035 | 0.009648  | -4.101643 |
| C | -2.115743 | -0.124368 | -3.209734 |
| C | -2.909859 | -8.308892 | 2.223204  |
| H | 1.673246  | -2.816960 | 2.816700  |
| H | 0.925167  | -5.049359 | 3.454879  |
| H | -0.759379 | -6.989246 | 3.217104  |
| H | -4.040641 | -6.574887 | 0.471257  |
| H | -4.265323 | -4.393850 | -0.889061 |
| H | -3.437936 | -2.171589 | -1.461190 |
| H | -3.568735 | 1.148178  | -0.427768 |
| H | -5.463863 | 1.390707  | -2.005496 |
| H | -5.216312 | 0.659908  | -4.368190 |
| H | -3.060380 | -0.312559 | -5.132373 |
| H | -1.174303 | -0.548820 | -3.542807 |
| H | -2.645237 | -8.577552 | 3.250105  |
| H | -3.994903 | -8.406588 | 2.123792  |
| H | -2.456950 | -9.061586 | 1.566189  |
| C | 1.101832  | -0.139158 | 0.922149  |
| C | 0.944398  | 1.032318  | 0.166767  |
| C | -0.166698 | 1.172663  | -0.763104 |
| C | -0.062883 | 2.477716  | -1.390929 |
| C | -0.782512 | 3.223626  | -2.351021 |
| C | -0.356019 | 4.493238  | -2.713501 |
| C | 0.807459  | 5.109686  | -2.150479 |
| C | 1.291525  | 6.392143  | -2.478973 |
| C | 2.442431  | 6.912403  | -1.875201 |
| C | 3.144959  | 6.158094  | -0.927978 |
| C | 2.715861  | 4.868683  | -0.553424 |
| C | 3.366443  | 4.023139  | 0.401798  |
| C | 2.896544  | 2.759008  | 0.728039  |
| C | 1.731625  | 2.251064  | 0.110811  |
| C | 1.089133  | 3.087613  | -0.835321 |
| C | 1.538981  | 4.362765  | -1.180404 |
| C | 2.241948  | -0.283222 | 1.876759  |
| C | 3.461193  | -0.829179 | 1.459313  |
| C | 4.525443  | -0.964504 | 2.348699  |
| C | 4.387497  | -0.554942 | 3.673949  |
| C | 3.178035  | -0.009648 | 4.101643  |
| C | 2.115743  | 0.124368  | 3.209734  |
| C | 2.909859  | 8.308892  | -2.223204 |

|   |           |           |           |
|---|-----------|-----------|-----------|
| H | -1.673246 | 2.816960  | -2.816700 |
| H | -0.925167 | 5.049359  | -3.454879 |
| H | 0.759379  | 6.989246  | -3.217104 |
| H | 4.040641  | 6.574887  | -0.471257 |
| H | 4.265323  | 4.393850  | 0.889061  |
| H | 3.437936  | 2.171589  | 1.461190  |
| H | 3.568735  | -1.148178 | 0.427768  |
| H | 5.463863  | -1.390707 | 2.005496  |
| H | 5.216312  | -0.659908 | 4.368190  |
| H | 3.060380  | 0.312559  | 5.132373  |
| H | 1.174303  | 0.548820  | 3.542807  |
| H | 2.645237  | 8.577552  | -3.250105 |
| H | 3.994903  | 8.406588  | -2.123792 |
| H | 2.456950  | 9.061586  | -1.566189 |

**BISPHE-Neutral: CS-B3LYP/6-311G\* geometry**

|   |           |           |           |
|---|-----------|-----------|-----------|
| C | 1.322393  | 5.672938  | -6.525590 |
| C | 1.935339  | 5.902888  | -5.292747 |
| C | 0.504555  | 4.563645  | -6.747064 |
| C | 1.741090  | 5.007428  | -4.224403 |
| C | 0.273563  | 3.633755  | -5.716077 |
| C | 2.318712  | 5.142270  | -2.917079 |
| C | 0.905058  | 3.881535  | -4.465288 |
| C | -0.546063 | 2.460577  | -5.829018 |
| C | 2.093467  | 4.229929  | -1.901546 |
| C | 0.694467  | 2.977755  | -3.425785 |
| C | -0.738955 | 1.578483  | -4.780615 |
| C | 1.263912  | 3.111101  | -2.137707 |
| C | -0.113343 | 1.821863  | -3.537600 |
| C | 0.796038  | 1.976069  | -1.376515 |
| C | -0.061232 | 1.173857  | -2.247608 |
| C | 1.018006  | 1.577262  | -0.074386 |
| C | -0.645221 | 0.020926  | -1.764369 |
| C | 0.424829  | 0.397504  | 0.431640  |
| H | 2.565063  | 6.777332  | -5.157991 |
| H | 0.044569  | 4.418024  | -7.719982 |
| H | 2.957947  | 5.999350  | -2.726011 |
| H | -1.031285 | 2.265035  | -6.780880 |
| H | 2.558677  | 4.386113  | -0.932927 |
| H | -1.370843 | 0.707687  | -4.927166 |
| C | -1.322393 | -5.672938 | 6.525590  |
| C | -1.935339 | -5.902888 | 5.292747  |
| C | -0.504555 | -4.563645 | 6.747064  |
| C | -1.741090 | -5.007428 | 4.224403  |

|   |           |           |           |
|---|-----------|-----------|-----------|
| C | -0.273563 | -3.633755 | 5.716077  |
| C | -2.318712 | -5.142270 | 2.917079  |
| C | -0.905058 | -3.881535 | 4.465288  |
| C | 0.546063  | -2.460577 | 5.829018  |
| C | -2.093467 | -4.229929 | 1.901546  |
| C | -0.694467 | -2.977755 | 3.425785  |
| C | 0.738955  | -1.578483 | 4.780615  |
| C | -1.263912 | -3.111101 | 2.137707  |
| C | 0.113343  | -1.821863 | 3.537600  |
| C | -0.796038 | -1.976069 | 1.376515  |
| C | 0.061232  | -1.173857 | 2.247608  |
| C | -1.018006 | -1.577262 | 0.074386  |
| C | 0.645221  | -0.020926 | 1.764369  |
| C | -0.424829 | -0.397504 | -0.431640 |
| H | -2.565063 | -6.777332 | 5.157991  |
| H | -0.044569 | -4.418024 | 7.719982  |
| H | -2.957947 | -5.999350 | 2.726011  |
| H | 1.031285  | -2.265035 | 6.780880  |
| H | -2.558677 | -4.386113 | 0.932927  |
| H | 1.370843  | -0.707687 | 4.927166  |
| H | 1.486415  | 6.376987  | -7.335297 |
| H | -1.486415 | -6.376987 | 7.335297  |
| H | 1.284695  | 0.584471  | 2.401831  |
| H | -1.653287 | -2.164886 | -0.583567 |
| H | -1.284695 | -0.584471 | -2.401831 |
| H | 1.653287  | 2.164886  | 0.583567  |

**BISPHE-Neutral: BS-UB3LYP/6-311G\* geometry**

|   |           |          |           |
|---|-----------|----------|-----------|
| C | 1.324049  | 5.680098 | -6.533827 |
| C | 1.937146  | 5.910339 | -5.301140 |
| C | 0.506165  | 4.570921 | -6.755615 |
| C | 1.742685  | 5.013088 | -4.230234 |
| C | 0.274479  | 3.638799 | -5.722557 |
| C | 2.318816  | 5.147750 | -2.926601 |
| C | 0.906339  | 3.886937 | -4.471508 |
| C | -0.542942 | 2.468926 | -5.835389 |
| C | 2.091292  | 4.230096 | -1.907754 |
| C | 0.695851  | 2.983532 | -3.432431 |
| C | -0.735430 | 1.584032 | -4.780951 |
| C | 1.265350  | 3.117604 | -2.145486 |
| C | -0.111632 | 1.828641 | -3.545075 |
| C | 0.793921  | 1.972932 | -1.376601 |
| C | -0.059745 | 1.174019 | -2.244100 |
| C | 1.017767  | 1.578992 | -0.077959 |
| C | -0.643797 | 0.024048 | -1.766398 |

|   |           |           |           |
|---|-----------|-----------|-----------|
| C | 0.422953  | 0.395795  | 0.429777  |
| H | 2.566869  | 6.784680  | -5.166194 |
| H | 0.046101  | 4.425133  | -7.728404 |
| H | 2.958309  | 6.004170  | -2.733662 |
| H | -1.028965 | 2.271735  | -6.786457 |
| H | 2.556237  | 4.385704  | -0.938825 |
| H | -1.367240 | 0.712966  | -4.926822 |
| C | -1.324049 | -5.680098 | 6.533827  |
| C | -1.937146 | -5.910339 | 5.301140  |
| C | -0.506165 | -4.570921 | 6.755615  |
| C | -1.742685 | -5.013088 | 4.230234  |
| C | -0.274479 | -3.638799 | 5.722557  |
| C | -2.318816 | -5.147750 | 2.926601  |
| C | -0.906339 | -3.886937 | 4.471508  |
| C | 0.542942  | -2.468926 | 5.835389  |
| C | -2.091292 | -4.230096 | 1.907754  |
| C | -0.695851 | -2.983532 | 3.432431  |
| C | 0.735430  | -1.584032 | 4.780951  |
| C | -1.265350 | -3.117604 | 2.145486  |
| C | 0.111632  | -1.828641 | 3.545075  |
| C | -0.793921 | -1.972932 | 1.376601  |
| C | 0.059745  | -1.174019 | 2.244100  |
| C | -1.017767 | -1.578992 | 0.077959  |
| C | 0.643797  | -0.024048 | 1.766398  |
| C | -0.422953 | -0.395795 | -0.429777 |
| H | -2.566869 | -6.784680 | 5.166194  |
| H | -0.046101 | -4.425133 | 7.728404  |
| H | -2.958309 | -6.004170 | 2.733662  |
| H | 1.028965  | -2.271735 | 6.786457  |
| H | -2.556237 | -4.385704 | 0.938825  |
| H | 1.367240  | -0.712966 | 4.926822  |
| H | 1.488050  | 6.384130  | -7.343519 |
| H | -1.488050 | -6.384130 | 7.343519  |
| H | 1.283009  | 0.580569  | 2.404576  |
| H | -1.653091 | -2.167228 | -0.579129 |
| H | -1.283009 | -0.580569 | -2.404576 |
| H | 1.653091  | 2.167228  | 0.579129  |

**BISPHE-Cation: UB3LYP/6-311G\* geometry**

|   |          |          |           |
|---|----------|----------|-----------|
| C | 1.323402 | 5.677307 | -6.530619 |
| C | 1.935038 | 5.904543 | -5.296519 |
| C | 0.506002 | 4.566959 | -6.749012 |
| C | 1.739392 | 5.005788 | -4.226119 |
| C | 0.275261 | 3.635333 | -5.714287 |
| C | 2.315476 | 5.142153 | -2.925651 |

|   |           |           |           |
|---|-----------|-----------|-----------|
| C | 0.905462  | 3.883187  | -4.467193 |
| C | -0.541071 | 2.468246  | -5.829115 |
| C | 2.090501  | 4.225832  | -1.902336 |
| C | 0.695497  | 2.982046  | -3.430718 |
| C | -0.736741 | 1.579315  | -4.776037 |
| C | 1.264528  | 3.116232  | -2.145231 |
| C | -0.111192 | 1.828457  | -3.543533 |
| C | 0.791705  | 1.968807  | -1.375141 |
| C | -0.058774 | 1.172825  | -2.239446 |
| C | 1.018443  | 1.579252  | -0.076481 |
| C | -0.644728 | 0.022707  | -1.766636 |
| C | 0.421805  | 0.394748  | 0.428634  |
| H | 2.564395  | 6.778324  | -5.161585 |
| H | 0.046181  | 4.421200  | -7.721179 |
| H | 2.954661  | 5.997960  | -2.732477 |
| H | -1.026968 | 2.270860  | -6.779496 |
| H | 2.555906  | 4.383247  | -0.935384 |
| H | -1.368185 | 0.709963  | -4.923988 |
| C | -1.323402 | -5.677307 | 6.530619  |
| C | -1.935038 | -5.904543 | 5.296519  |
| C | -0.506002 | -4.566959 | 6.749012  |
| C | -1.739392 | -5.005788 | 4.226119  |
| C | -0.275261 | -3.635333 | 5.714287  |
| C | -2.315476 | -5.142153 | 2.925651  |
| C | -0.905462 | -3.883187 | 4.467193  |
| C | 0.541071  | -2.468246 | 5.829115  |
| C | -2.090501 | -4.225832 | 1.902336  |
| C | -0.695497 | -2.982046 | 3.430718  |
| C | 0.736741  | -1.579315 | 4.776037  |
| C | -1.264528 | -3.116232 | 2.145231  |
| C | 0.111192  | -1.828457 | 3.543533  |
| C | -0.791705 | -1.968807 | 1.375141  |
| C | 0.058774  | -1.172825 | 2.239446  |
| C | -1.018443 | -1.579252 | 0.076481  |
| C | 0.644728  | -0.022707 | 1.766636  |
| C | -0.421805 | -0.394748 | -0.428634 |
| H | -2.564395 | -6.778324 | 5.161585  |
| H | -0.046181 | -4.421200 | 7.721179  |
| H | -2.954661 | -5.997960 | 2.732477  |
| H | 1.026968  | -2.270860 | 6.779496  |
| H | -2.555906 | -4.383247 | 0.935384  |
| H | 1.368185  | -0.709963 | 4.923988  |
| H | 1.487183  | 6.380374  | -7.339202 |
| H | -1.487183 | -6.380374 | 7.339202  |
| H | 1.283253  | 0.580691  | 2.405187  |
| H | -1.653434 | -2.167794 | -0.579227 |
| H | -1.283253 | -0.580691 | -2.405187 |

H 1.653434 2.167794 0.579227

**BISPHE-Anion: UB3LYP/6-311G\* geometry**

|   |           |           |           |
|---|-----------|-----------|-----------|
| C | 1.325018  | 5.684219  | -6.538575 |
| C | 1.939602  | 5.917360  | -5.307069 |
| C | 0.506548  | 4.576017  | -6.763637 |
| C | 1.746338  | 5.021271  | -4.234998 |
| C | 0.273672  | 3.642826  | -5.731838 |
| C | 2.322646  | 5.154405  | -2.928196 |
| C | 0.907272  | 3.890946  | -4.476118 |
| C | -0.544937 | 2.470168  | -5.842872 |
| C | 2.092974  | 4.236159  | -1.914012 |
| C | 0.696161  | 2.984882  | -3.433980 |
| C | -0.734456 | 1.589468  | -4.787900 |
| C | 1.266419  | 3.118716  | -2.144585 |
| C | -0.112654 | 1.827810  | -3.546287 |
| C | 0.797737  | 1.981068  | -1.380734 |
| C | -0.060872 | 1.177481  | -2.253297 |
| C | 1.017372  | 1.578661  | -0.078317 |
| C | -0.643403 | 0.024369  | -1.766031 |
| C | 0.425221  | 0.397942  | 0.432103  |
| H | 2.569958  | 6.792844  | -5.172467 |
| H | 0.046183  | 4.430504  | -7.737715 |
| H | 2.962816  | 6.011919  | -2.735372 |
| H | -1.031368 | 2.273047  | -6.795164 |
| H | 2.558367  | 4.391508  | -0.943396 |
| H | -1.367130 | 0.716902  | -4.933432 |
| C | -1.325018 | -5.684219 | 6.538575  |
| C | -1.939602 | -5.917360 | 5.307069  |
| C | -0.506548 | -4.576017 | 6.763637  |
| C | -1.746338 | -5.021271 | 4.234998  |
| C | -0.273672 | -3.642826 | 5.731838  |
| C | -2.322646 | -5.154405 | 2.928196  |
| C | -0.907272 | -3.890946 | 4.476118  |
| C | 0.544937  | -2.470168 | 5.842872  |
| C | -2.092974 | -4.236159 | 1.914012  |
| C | -0.696161 | -2.984882 | 3.433980  |
| C | 0.734456  | -1.589468 | 4.787900  |
| C | -1.266419 | -3.118716 | 2.144585  |
| C | 0.112654  | -1.827810 | 3.546287  |
| C | -0.797737 | -1.981068 | 1.380734  |
| C | 0.060872  | -1.177481 | 2.253297  |
| C | -1.017372 | -1.578661 | 0.078317  |
| C | 0.643403  | -0.024369 | 1.766031  |
| C | -0.425221 | -0.397942 | -0.432103 |

|   |           |           |           |
|---|-----------|-----------|-----------|
| H | -2.569958 | -6.792844 | 5.172467  |
| H | -0.046183 | -4.430504 | 7.737715  |
| H | -2.962816 | -6.011919 | 2.735372  |
| H | 1.031368  | -2.273047 | 6.795164  |
| H | -2.558367 | -4.391508 | 0.943396  |
| H | 1.367130  | -0.716902 | 4.933432  |
| H | 1.489343  | 6.389623  | -7.349847 |
| H | -1.489343 | -6.389623 | 7.349847  |
| H | 1.283579  | 0.582039  | 2.403649  |
| H | -1.653141 | -2.166450 | -0.580782 |
| H | -1.283579 | -0.582039 | -2.403649 |
| H | 1.653141  | 2.166450  | 0.580782  |
